# Supplementary material for: Theoretical investigation of the OH-initiated atmospheric degradation mechanism of CX2CHX (X = H, F, Cl) by advanced quantum chemical and transition state theory methods
Source: Royal Society of Chemistry journal article supplement (doi:10.1039/d4cp01453g), 2024-01-01
Supplement: d4cp01453g1.pdf [file d4cp01453g1.pdf]

## SUPPORTING INFORMATION

### Theoretical investigation of the OH-initiated atmospheric degradation mechanism of $CX_2=CHX$ ( $X = H, F, Cl$ ) by advanced quantum chemical and transition state theory methods.

Nadjib Rais<sup>a,b</sup>, Zoi Salta<sup>a\*</sup>, and Nicola Tasinato<sup>a</sup>

<sup>a</sup> Scuola Normale Superiore, Piazza dei Cavalieri 7, I-56126, Pisa, Italy

<sup>b</sup> IUSS Scuola Universitaria Superiore, Piazza della Vittoria 15, I-27100, Pavia, Italy

### TABLE OF CONTENTS

|                                                                                                                                                                                                                                                                                                                                                                      |
|----------------------------------------------------------------------------------------------------------------------------------------------------------------------------------------------------------------------------------------------------------------------------------------------------------------------------------------------------------------------|
| <b>S1.</b> Computational details for the Kinetics Model of barrierless OH-addition.....(S2)                                                                                                                                                                                                                                                                          |
| <b>Figure S1.</b> Potential energy (kcal mol <sup>-1</sup> ) along the C–O distance (Å) at different levels of theory for the addition of the OH radical to the C=C double bond of CH <sub>2</sub> =CH <sub>2</sub> (a), CF <sub>2</sub> =CHF (b, c) and CCl <sub>2</sub> =CHCl (d, e). The zero of the energy is set to be the energy of the addition adduct...(S3) |
| <b>Figure S2.</b> Potential Mean Unsigned Error (kcal mol <sup>-1</sup> ) at different levels of theory compared to jChS method in the region 2.0-2.5 Å for the addition of the OH radical to the C=C double bond of CH <sub>2</sub> =CH <sub>2</sub> (a), CF <sub>2</sub> =CHF (b, c) and CCl <sub>2</sub> =CHCl (d, e).....(S4)                                    |
| <b>Table S1.</b> CH <sub>2</sub> =CH <sub>2</sub> + OH association relative energies in the 2.0-2.5 Å range.....(S5)                                                                                                                                                                                                                                                 |
| <b>Figure S3.</b> Location of the pivot points that define the two-faceted dividing surface of the inner transition states for the OH addition to the (a) CHF and (b) CF <sub>2</sub> groups and (c) for the outer transition state.....(S5)                                                                                                                         |
| <b>Table S2.</b> Predicted Rate Coefficients for CX <sub>2</sub> =CHX + OH (X = H, F and Cl) reactions with N <sub>2</sub> as Buffer Gas (T = 100 – 600 K).....(S6)                                                                                                                                                                                                  |
| <b>Figure S4.</b> Structures of the minima and transition states present in the PES for the CH <sub>2</sub> =CH <sub>2</sub> + OH reaction.....(S8)                                                                                                                                                                                                                  |
| <b>Figure S5.</b> Structures of the minima and transition states present in the PES for the CF <sub>2</sub> =CHF + OH reaction.....(S9)                                                                                                                                                                                                                              |
| <b>Figure S6.</b> Structures of the minima and transition states present in the PES for the CCl <sub>2</sub> =CHCl + OH reaction.....(S13)                                                                                                                                                                                                                           |
| <b>S2.</b> Cartesian coordinates and harmonic vibrational frequencies of equilibrium geometries at                                                                                                                                                                                                                                                                   |

the rev-DSD-PBEP86-D3(BJ)/jun-cc-pV(T+d)Z level of theory .....(S16)

## **S1. Computational details for the Kinetics Model of barrierless OH-addition:**

Variable Reaction Coordinate-Variational Transition State Theory (VRC-VTST) with a multifaceted dividing surface<sup>1,2</sup> was employed to evaluate the number of states  $N_{outer}^{\ddagger}(E)$  and  $N_{inner}^{\ddagger}(E)$  of the two transition state model,<sup>3,4</sup> in order to include fully anharmonic treatments of all the inter-fragment modes. Since the most computationally expensive step in the VRC-VTST calculations is the Monte Carlo sampling (in which thousands of energy calculations need to be performed to explore different configurations of the system and to obtain accurate number of accessible states of transitional modes), we tested several spin-unrestricted density functional methods (B3LYP-D3(BJ)<sup>5</sup>,  $\omega$ B97X-D<sup>6</sup>, MN12-L<sup>7</sup>, M06-L<sup>8</sup> and M08-HX<sup>9</sup>) in conjunction with the MG3S basis set<sup>10</sup>, in order to find the one which best matches the reference jChS results. The reason for employing the jChS results as benchmark values is that several previous studies have shown that this composite scheme provides sub-chemical accuracy ( $\sim 0.3$  kcal mol<sup>-1</sup>) for reaction energies and barriers over a large panel of different systems<sup>11-14</sup> in the absence of strong static correlation. Since the T1 diagnostic<sup>15</sup> for the species present in the bond association path was found to be less than 0.044, single-reference based composite schemes like jChS can be safely used without the risk of any unphysical bump.<sup>16</sup> Benchmark results for the three reactive systems are shown in Figure S1 for the OH addition to both carbon atoms of the double bond, and the Mean Unsigned Error (MUE) of different levels of theory with respect to the jChS reference is presented in Figure S2. Inspection of both Figures shows a remarkable agreement between M08-HX and jChS trends, with a MUE < 1 kcal mol<sup>-1</sup> in the region 2.0-2.5 Å, where the most relevant dynamical bottleneck lies for this class of reactions. In addition to the above-mentioned density functionals, some exploratory computations for the reaction between OH and ethylene were also carried out at the rev-DSDPBEP86-D3<sup>17</sup> double-hybrid density functional theory, that was augmented by DFT-D3 dispersion with Becke-Johnson (BJ) damping,<sup>18,19</sup> in conjunction with the partially augmented jun-cc-pV(T+d)Z<sup>20</sup> basis set. Even though the computational cost of double-hybrid density functionals cannot be afforded in the VRC-VTST procedure, some points in the range 2.0 - 2.5 Å along the MEP were selected and the rev-DSDPBEP86 energies were compared to the jChS reference values to estimate the performance of this method which is supposed to be superior. Interestingly, an average accuracy close to that of the M08-HX functional was obtained (see Table S1), thus giving further confidence for the choice of this functional for the Monte Carlo sampling in the VRC-VTST computations.

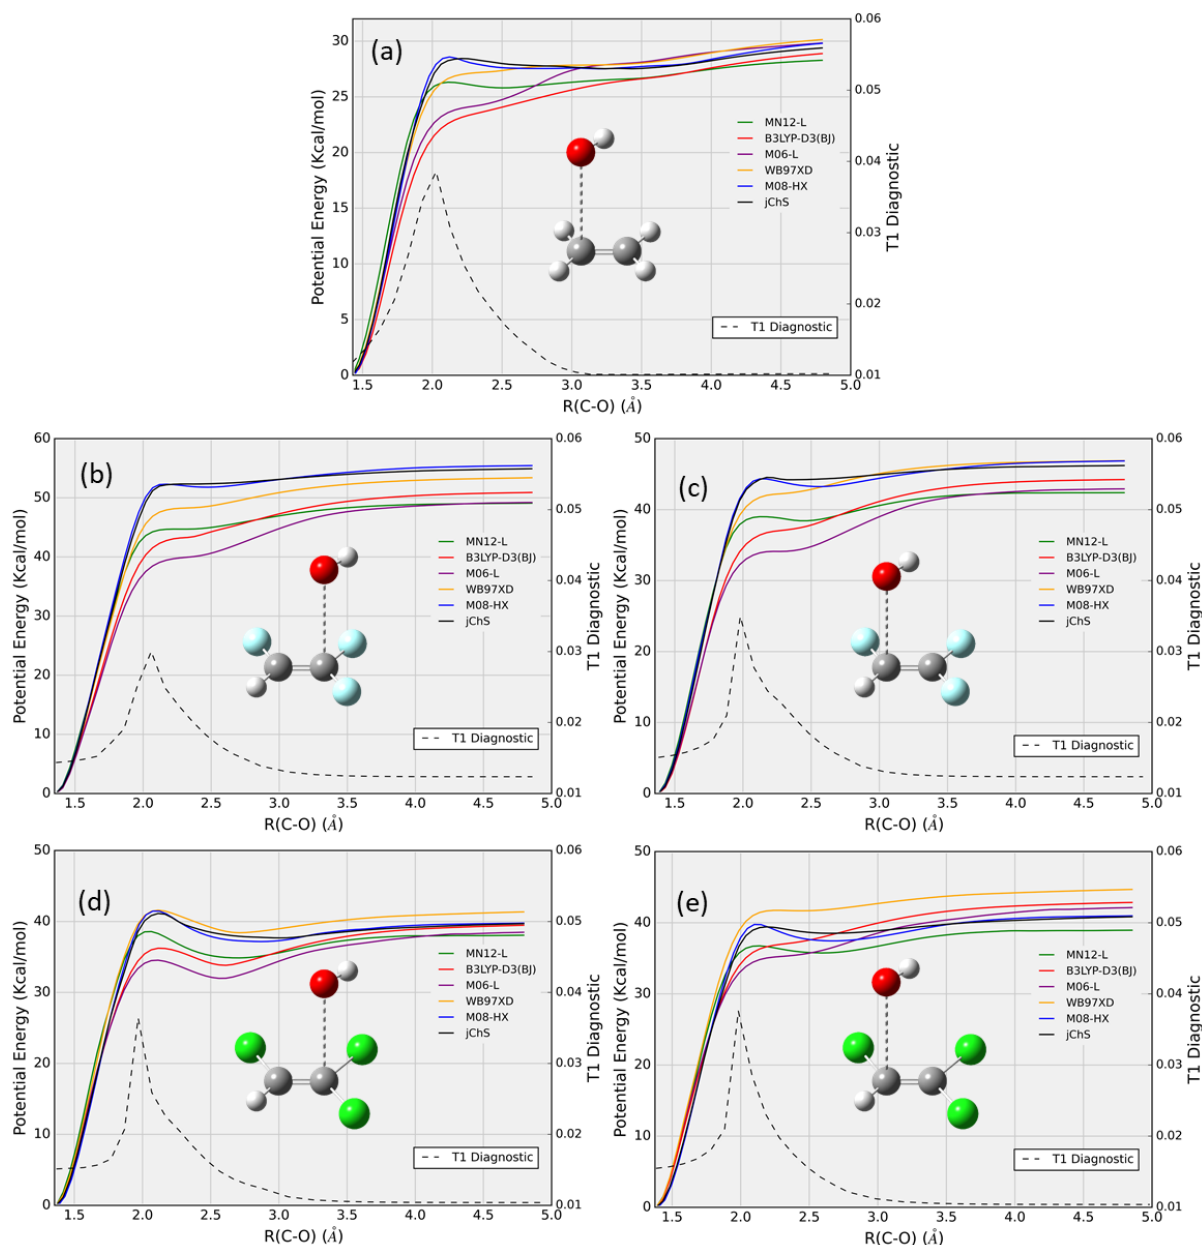

**Figure S1.** Potential energy ( $\text{kcal mol}^{-1}$ ) along the C–O distance ( $\text{\AA}$ ) at different levels of theory for the addition of the OH radical to the C=C double bond of  $\text{CH}_2=\text{CH}_2$  (a),  $\text{CF}_2=\text{CHF}$  (b, c) and  $\text{CCl}_2=\text{CHCl}$  (d, e). The zero of the energy is set to be the energy of the addition adduct.

Next, we setup the variable reaction coordinate for the multifaceted VRC-VTST calculations. We describe the adopted method with reference to the  $\text{CF}_2=\text{CHF} + \text{OH}$  reactive system, since the same setup was applied for the other systems. For the inner TS, we studied the addition to –  $\text{CF}_2$  and –  $\text{CHF}$  fragments separately. In both cases a two-faceted dividing surface was obtained by placing two pivot points perpendicularly above and below the C atom, and a third pivot point in proximity to the O atom, as shown in Figure S3 (a, b). The distances between the pivot points 1, 2 and the C atom, and between pivot point 3 and O atom were 0.25  $\text{\AA}$  and 0.3  $\text{\AA}$ , respectively. Pivot points 1, 2 and 3 of the reactants were separated by distances

$r_{13}$  and  $r_{23}$ , and the reaction coordinate  $s$  ( $r_{13}$  and  $r_{23}$ ) was variationally minimized within the  $1.9 \text{ \AA} \leq s \leq 3.0 \text{ \AA}$  interval, with a  $0.1 \text{ \AA}$  step. The location of the pivot points was also varied during the minimization of the flux from its original location, up to a distance of  $0.31 \text{ \AA}$  for the C atom and  $0.36 \text{ \AA}$  for the O atom, with a  $0.015 \text{ \AA}$  step, and a set of 1000 Monte Carlo sampling points over the multifaceted dividing surface was employed. All the calculated reactive fluxes were multiplied by a 0.9 factor to correct for recrossing dynamical effects, on the grounds of previous comparisons with trajectory simulations for prototypical systems.<sup>21,22</sup>

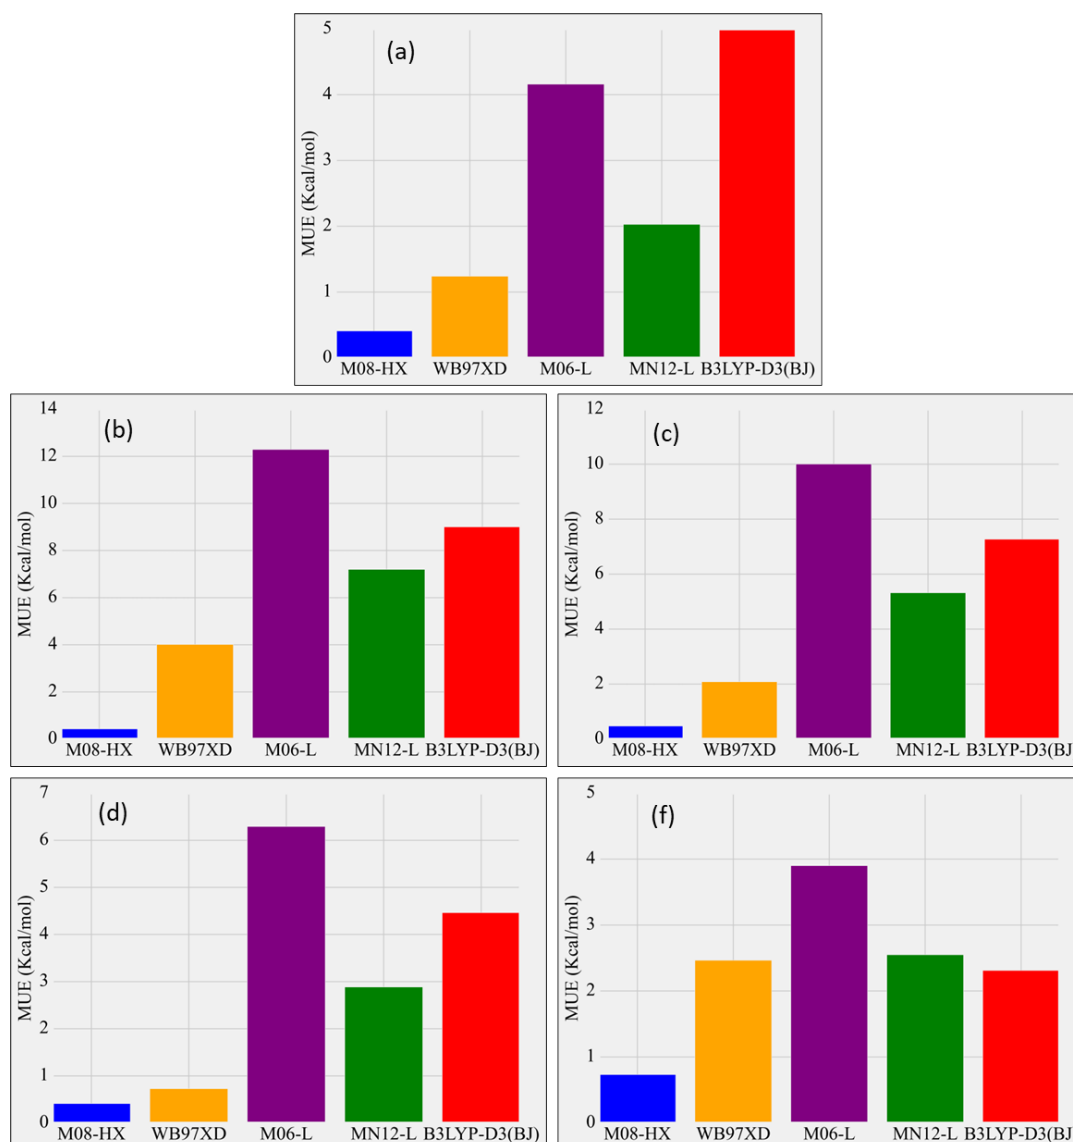

**Figure S2.** Potential Mean Unsigned Error (kcal mol<sup>-1</sup>) at different levels of theory compared to jChS method in the region 2.0-2.5 Å for the addition of the OH radical to the C=C double bond of CH<sub>2</sub>=CH<sub>2</sub> (a), CF<sub>2</sub>=CHF (b, c) and CCl<sub>2</sub>=CHCl (d, e).

**Table S1.** CH<sub>2</sub>=CH<sub>2</sub> + OH association relative energies in the 2.0-2.5 Å range. Values are given in kcal mol<sup>-1</sup>.

| distance (Å)     | jChS     | M08-HX <sup>a</sup> | revDSD <sup>b</sup> |
|------------------|----------|---------------------|---------------------|
| 2.0              | 26.78323 | 27.67038            | 27.83063            |
| 2.1              | 28.19802 | 28.57619            | 28.66596            |
| 2.2              | 28.43778 | 28.29279            | 28.46171            |
| 2.3              | 28.35288 | 27.95686            | 27.96769            |
| 2.4              | 28.17183 | 27.74198            | 27.49974            |
| 2.5              | 27.99021 | 27.60651            | 27.15564            |
| MUE <sup>c</sup> | 0        | 0.436644            | 0.571851            |

<sup>a</sup>M08HX/MG3S; <sup>b</sup>revDSD-PBEP86-D3(BJ)/jun-cc-pV(T+d)Z; <sup>c</sup>Mean Unsigned Error relative to jChS energies.

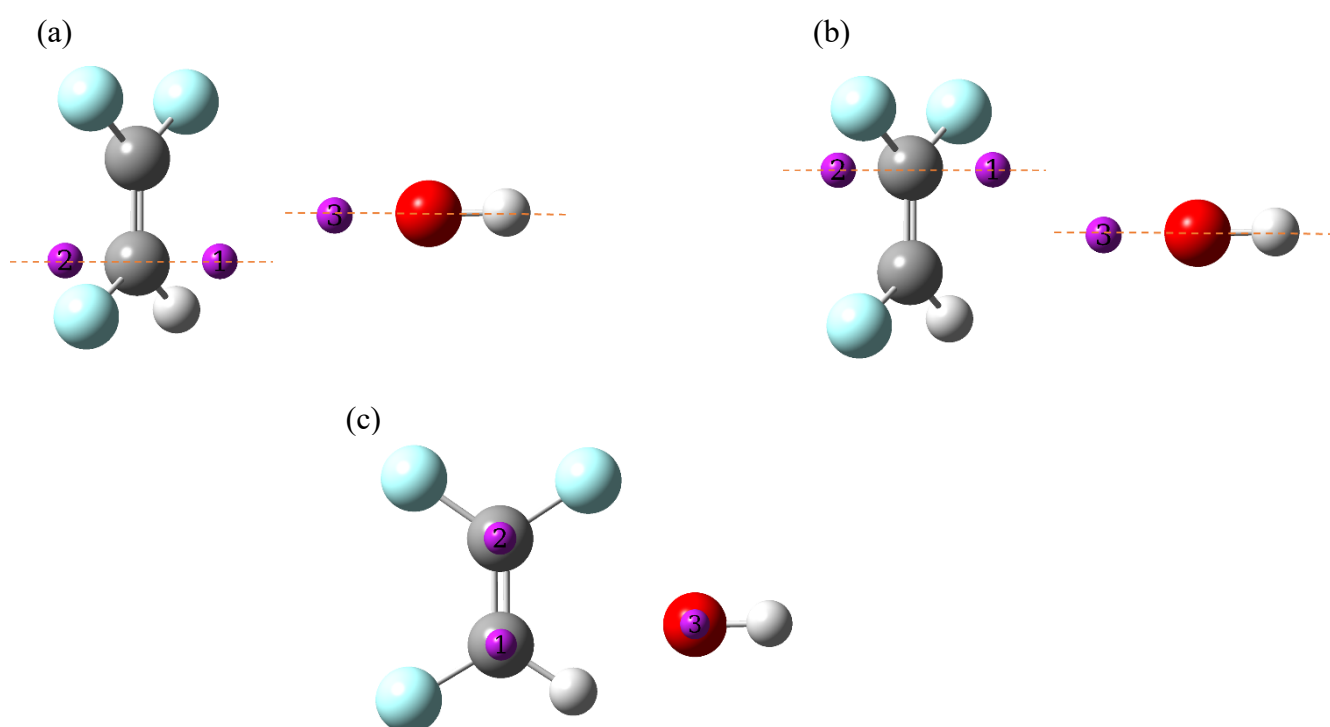

**Figure S3.** Location of the pivot points that define the two-faceted dividing surface of the inner transition states for the OH addition to the (a) CHF and (b) CF<sub>2</sub> groups and (c) for the outer transition state.

For the outer TS, the two-faceted dividing surface was obtained by employing as pivot points the C and O atoms, as shown in Figure S3 (c). The reaction coordinate, which was defined as the distance between the C atoms of CF<sub>2</sub>=CHF moiety and the O atom of OH, was variationally minimized within the 3.5 Å ≤ *s* ≤ 6.0 Å interval, with a 0.1 Å step. For each of the two facets of the dividing surface, 1000 configurations were explored by Monte Carlo sampling, leading to 2000 single-point calculations for each step.

**Table S2.** Predicted Rate Coefficients for  $CX_2=CHX + OH$  ( $X = H, F$  and  $Cl$ ) reactions with  $N_2$  as Buffer Gas ( $T = 100 - 600$  K).

$k(T) = A_1(T/300)^{n_1} \exp(-E_1/RT) + A_2(T/300)^{n_2} \exp(-E_2/RT)$   $cm^3$  molecule $^{-1}$  s $^{-1}$ , where  $R = 1.987$  cal mol $^{-1}$  K $^{-1}$  and  $T$  is in K.

| Reaction          | Products           | $P$ (atm)          | $A_1$    | $n_1$    | $E_1$    | $A_2$    | $n_2$    | $E_2$   |        |
|-------------------|--------------------|--------------------|----------|----------|----------|----------|----------|---------|--------|
| $CH_2=CH_2 + OH$  | Total (P-depend)   | 0.01               | 3.89E-12 | -2.37    | 98.3     | /        | /        | /       |        |
|                   |                    | 0.1                | 5.04E-12 | -1.42    | -64.7    | /        | /        | /       |        |
|                   |                    | 1                  | 4.48E-12 | -0.53    | -284.2   | /        | /        | /       |        |
|                   |                    | HPL                | 3.65E-12 | -1.04    | -196.6   | 8.15E-13 | 2.02     | -687.6  |        |
|                   | $C_2H_4OH$         | 0.01               | 7.07E-12 | -3.66    | 508.5    | /        | /        | /       |        |
|                   |                    | 0.1                | 5.26E-12 | -1.55    | -29.0    | /        | /        | /       |        |
|                   |                    | 1                  | 4.67E-12 | -0.63    | -254.5   | /        | /        | /       |        |
|                   | $HOCHCH_2 + H$     | 0.01               | 1.68E-16 | 6.29     | 1025.7   | /        | /        | /       |        |
|                   |                    | 0.1                | 1.15E-15 | 4.70     | 2242.7   | /        | /        | /       |        |
|                   |                    | 1                  | 6.62E-16 | 6.18     | 2337.5   | /        | /        | /       |        |
|                   | $CH_2O + CH_3$     | 0.01               | 1.74E-15 | 0.66     | -293.6   | 3.80E-15 | 2.15     | 1933.9  |        |
|                   |                    | 0.1                | 1.14E-16 | -5.21    | 928.4    | 9.39E-16 | 2.65     | -49.2   |        |
|                   |                    | 1                  | 1.83E-17 | 4.86     | -1177.8  | 9.44E-14 | 0.21     | 4300.3  |        |
|                   | $OCHCH_3 + H$      | 0.01               | 2.59E-17 | 2.05     | -552.2   | 2.64E-18 | 6.27     | -664.1  |        |
|                   |                    | 0.1                | 5.97E-19 | -7.42    | 1355.5   | 7.58E-18 | 4.94     | -838.1  |        |
|                   |                    | 1                  | 6.79E-19 | 2.14     | -317.0   | 4.48E-17 | 4.52     | 1199.1  |        |
|                   | $C_2H_3 + H_2O$    | P-indep            | 1.85E-14 | 5.47     | 1738.9   | /        | /        | /       |        |
|                   | $CF_2=CHF + OH$    | Total (P-independ) | HPL      | 3.04E-12 | -1.78    | -116.9   | 1.07E-12 | 1.54    | -656.8 |
|                   |                    | $CF_2(OH)CHF$      | 0.01     | 2.35E-13 | -9.75    | 1418.3   | /        | /       | /      |
|                   |                    |                    | 0.1      | 3.90E-12 | -5.37    | 834.1    | /        | /       | /      |
| 1                 |                    |                    | 3.25E-11 | -3.77    | 1397.6   | 1.10E-12 | -7.50    | 1026.9  |        |
| $CF_2CHF(OH)$     |                    | 0.01               | 1.20E-12 | -7.90    | 1286.5   | /        | /        | /       |        |
|                   |                    | 0.1                | 4.25E-12 | -4.28    | 683.1    | /        | /        | /       |        |
|                   |                    | 1                  | 5.12E-11 | -3.75    | 1748.4   | 1.28E-14 | -6.50    | 909.1   |        |
| $CHFCFO + HF$     |                    | 0.01               | 2.93E-12 | -1.49    | -26.5    | 2.25E-12 | 0.71     | 771.1   |        |
|                   |                    | 0.1                | 1.80E-12 | 0.54     | -159.8   | 1.65E-14 | -1.32    | -497.1  |        |
|                   |                    | 1                  | 1.52E-13 | 1.97     | -581.5   | 1.89E-09 | -3.27    | 5965.3  |        |
| $CF_2O + CH_2F$   |                    | 0.01               | 3.39E-14 | -1.43    | -30.2    | 9.82E-15 | 1.92     | -371.1  |        |
|                   |                    | 0.1                | 1.30E-14 | 1.16     | -425.2   | 3.85E-15 | 2.03     | -380.8  |        |
|                   |                    | 1                  | 1.58E-15 | 2.83     | -785.0   | 2.40E-11 | -2.62    | 5932.3  |        |
| $CH_2FCFO + F$    |                    | 0.01               | 2.05E-19 | 1.63     | -583.6   | 8.19E-20 | 5.90     | -879.3  |        |
|                   |                    | 0.1                | 4.77E-20 | 5.72     | -1422.8  | 3.11E-20 | 6.23     | -199.6  |        |
|                   |                    | 1                  | 6.34E-21 | 6.84     | -1600.9  | 4.42E-17 | 2.30     | 4186.5  |        |
| $CF_2CHO + HF$    |                    | 0.01               | 2.34E-12 | -0.33    | 60.2     | 7.30E-08 | -4.72    | 10772.8 |        |
|                   |                    | 0.1                | 1.89E-13 | 1.63     | -307.6   | 4.00E-10 | -3.28    | 4168.1  |        |
|                   |                    | 1                  | 7.09E-15 | 5.05     | -1228.0  | 2.86E-09 | -3.16    | 7266.8  |        |
| $CF_3CHO + H$     |                    | 0.01               | 3.87E-13 | 0.63     | -10.1    | 8.24E-10 | -2.83    | 8276.2  |        |
|                   |                    | 0.1                | 5.44E-11 | -1.74    | 3871.5   | 6.23E-14 | -0.61    | 760.43  |        |
|                   |                    | 1                  | 5.68E-13 | 3.79     | 3085.4   | 3.92E-15 | 0.45     | 1060.3  |        |
| $CF_2H + CHFO$    |                    | 0.01               | 2.64E-15 | 0.87     | -350.8   | 2.79E-14 | 1.13     | 2695.4  |        |
|                   |                    | 0.1                | 3.00E-16 | -7.65    | 1518.3   | 4.39E-15 | 1.90     | 333.0   |        |
|                   |                    | 1                  | 5.29E-17 | 4.25     | -1006.4  | 8.59E-14 | 1.11     | 3668.0  |        |
| $CHF_2CFO + H$    |                    | 0.01               | 1.14E-17 | 1.94     | -554.3   | 5.39E-17 | 3.27     | 1571.3  |        |
|                   |                    | 0.1                | 9.49E-19 | -11.97   | 2473.7   | 8.51E-18 | 4.07     | -419.14 |        |
|                   |                    | 1                  | 1.91E-19 | 6.40     | -1479.7  | 5.41E-15 | 0.58     | 5055.0  |        |
| $CF_3 + CH_2O$    |                    | 0.01               | 3.75E-13 | -0.14    | 133.2    | 6.20E-07 | -7.30    | 13965.9 |        |
|                   |                    | 0.1                | 3.46E-11 | -2.22    | 3789.0   | 3.86E-14 | -0.48    | 587.4   |        |
|                   | 1                  | 1.39E-16           | 7.56     | -1419.4  | 1.13E-12 | 2.48     | 4091.26  |         |        |
| $C_2F_3 + H_2O$   | P-indep            | 3.05E-17           | 7.02     | 4662.4   | /        | /        | /        |         |        |
| $CCl_2=CHCl + OH$ | Total (P-independ) | HPL                | 5.63E-13 | 1.73     | -590.7   | 5.67E-13 | -1.35    | -161.9  |        |

|                                                   |         |          |       |         |          |       |         |
|---------------------------------------------------|---------|----------|-------|---------|----------|-------|---------|
| CHCl(OH)CCl <sub>2</sub>                          | 0.01    | 3.47E-20 | -8.23 | 459.7   | /        | /     | /       |
|                                                   | 0.1     | 2.45E-17 | -9.73 | 775.3   | /        | /     | /       |
|                                                   | 1       | 4.30E-14 | -9.26 | 1249.3  | /        | /     | /       |
| CHClCCl <sub>2</sub> (OH)                         | 0.01    | 2.69E-22 | -6.68 | 947.1   | /        | /     | /       |
|                                                   | 0.1     | 4.62E-20 | -9.71 | 910.4   | /        | /     | /       |
|                                                   | 1       | 1.13E-15 | -9.83 | 1708.8  | /        | /     | /       |
| CCl <sub>2</sub> CHOH + Cl                        | 0.01    | 4.99E-13 | 1.56  | -592.8  | 5.21E-13 | -1.37 | -174.4  |
|                                                   | 0.1     | 4.77E-13 | 1.58  | -637.1  | 5.09E-13 | -1.43 | -155.8  |
|                                                   | 1       | 1.99E-12 | 0.91  | 953.7   | 1.23E-12 | -0.54 | -170.9  |
| CCl <sub>2</sub> CClOH + H                        | 0.01    | 3.11E-22 | 13.22 | 1365.8  | /        | /     | /       |
|                                                   | 0.1     | 1.07E-22 | 13.98 | 725.8   | /        | /     | /       |
|                                                   | 1       | 2.45E-22 | 13.42 | 1233.6  | /        | /     | /       |
| CHCl <sub>2</sub> CClO + H                        | 0.01    | 2.89E-26 | 15.45 | -3568.2 | /        | /     | /       |
|                                                   | 0.1     | 3.22E-26 | 15.33 | -3499.4 | /        | /     | /       |
|                                                   | 1       | 4.83E-26 | 15.20 | -3257.3 | /        | /     | /       |
| CHClO + CHCl <sub>2</sub>                         | 0.01    | 2.06E-21 | -0.77 | 110.1   | 2.45E-22 | 10.31 | -2694.7 |
|                                                   | 0.1     | 8.95E-22 | 3.87  | -1182.5 | 6.80E-22 | 9.88  | -1939.3 |
|                                                   | 1       | 1.27E-21 | 5.99  | -1445.6 | 3.17E-20 | 7.31  | 759.2   |
| CHCl <sub>2</sub> CHO + Cl                        | 0.01    | 3.10E-23 | 8.11  | 14621.8 | /        | /     | /       |
|                                                   | 0.1     | 5.56E-23 | 7.62  | 14971.4 | /        | /     | /       |
|                                                   | 1       | 5.77E-23 | 7.51  | 14994.9 | /        | /     | /       |
| CHClOCHCl + Cl                                    | 0.01    | 9.95E-29 | 20.08 | 1853.6  | /        | /     | /       |
|                                                   | 0.1     | 5.80E-29 | 20.66 | 1531.9  | /        | /     | /       |
|                                                   | 1       | 7.87E-29 | 20.37 | 1717.7  | /        | /     | /       |
| CHClCClOH + Cl                                    | 0.01    | 1.04E-13 | 2.18  | -426.1  | /        | /     | /       |
|                                                   | 0.1     | 1.03E-13 | 2.20  | -430.7  | /        | /     | /       |
|                                                   | 1       | 1.23E-13 | 2.04  | -329.4  | /        | /     | /       |
| CHCl <sub>2</sub> CO + HCl                        | 0.01    | 2.90E-23 | 13.65 | -2865.5 | /        | /     | /       |
|                                                   | 0.1     | 2.99E-23 | 13.67 | -2846.0 | /        | /     | /       |
|                                                   | 1       | 3.71E-23 | 13.75 | -2698.5 | /        | /     | /       |
| CCl <sub>2</sub> O + CH <sub>2</sub> Cl           | 0.01    | 7.58E-22 | 9.85  | -2058.1 | /        | /     | /       |
|                                                   | 0.1     | 9.51E-22 | 9.60  | -1918.2 | /        | /     | /       |
|                                                   | 1       | 1.62E-21 | 8.95  | -1544.3 | /        | /     | /       |
| CH <sub>2</sub> OCCl <sub>2</sub> + Cl            | 0.01    | 2.32E-26 | 14.58 | 2074.0  | /        | /     | /       |
|                                                   | 0.1     | 2.82E-26 | 14.31 | 2197.6  | /        | /     | /       |
|                                                   | 1       | 4.03E-26 | 13.97 | 2430.7  | /        | /     | /       |
| CH <sub>2</sub> ClCClO + Cl                       | 0.01    | 5.95E-29 | 19.98 | 6014.3  | /        | /     | /       |
|                                                   | 0.1     | 4.21E-29 | 20.29 | 5807.2  | /        | /     | /       |
|                                                   | 1       | 3.29E-29 | 20.49 | 5662.8  | /        | /     | /       |
| C <sub>2</sub> Cl <sub>3</sub> + H <sub>2</sub> O | P-indep | 4.35E-26 | 20.79 | 7242.7  | /        | /     | /       |

**Figure S4.** Structures of the minima and transition states present in the PES for the  $\text{CH}_2=\text{CH}_2 + \text{OH}$  reaction.

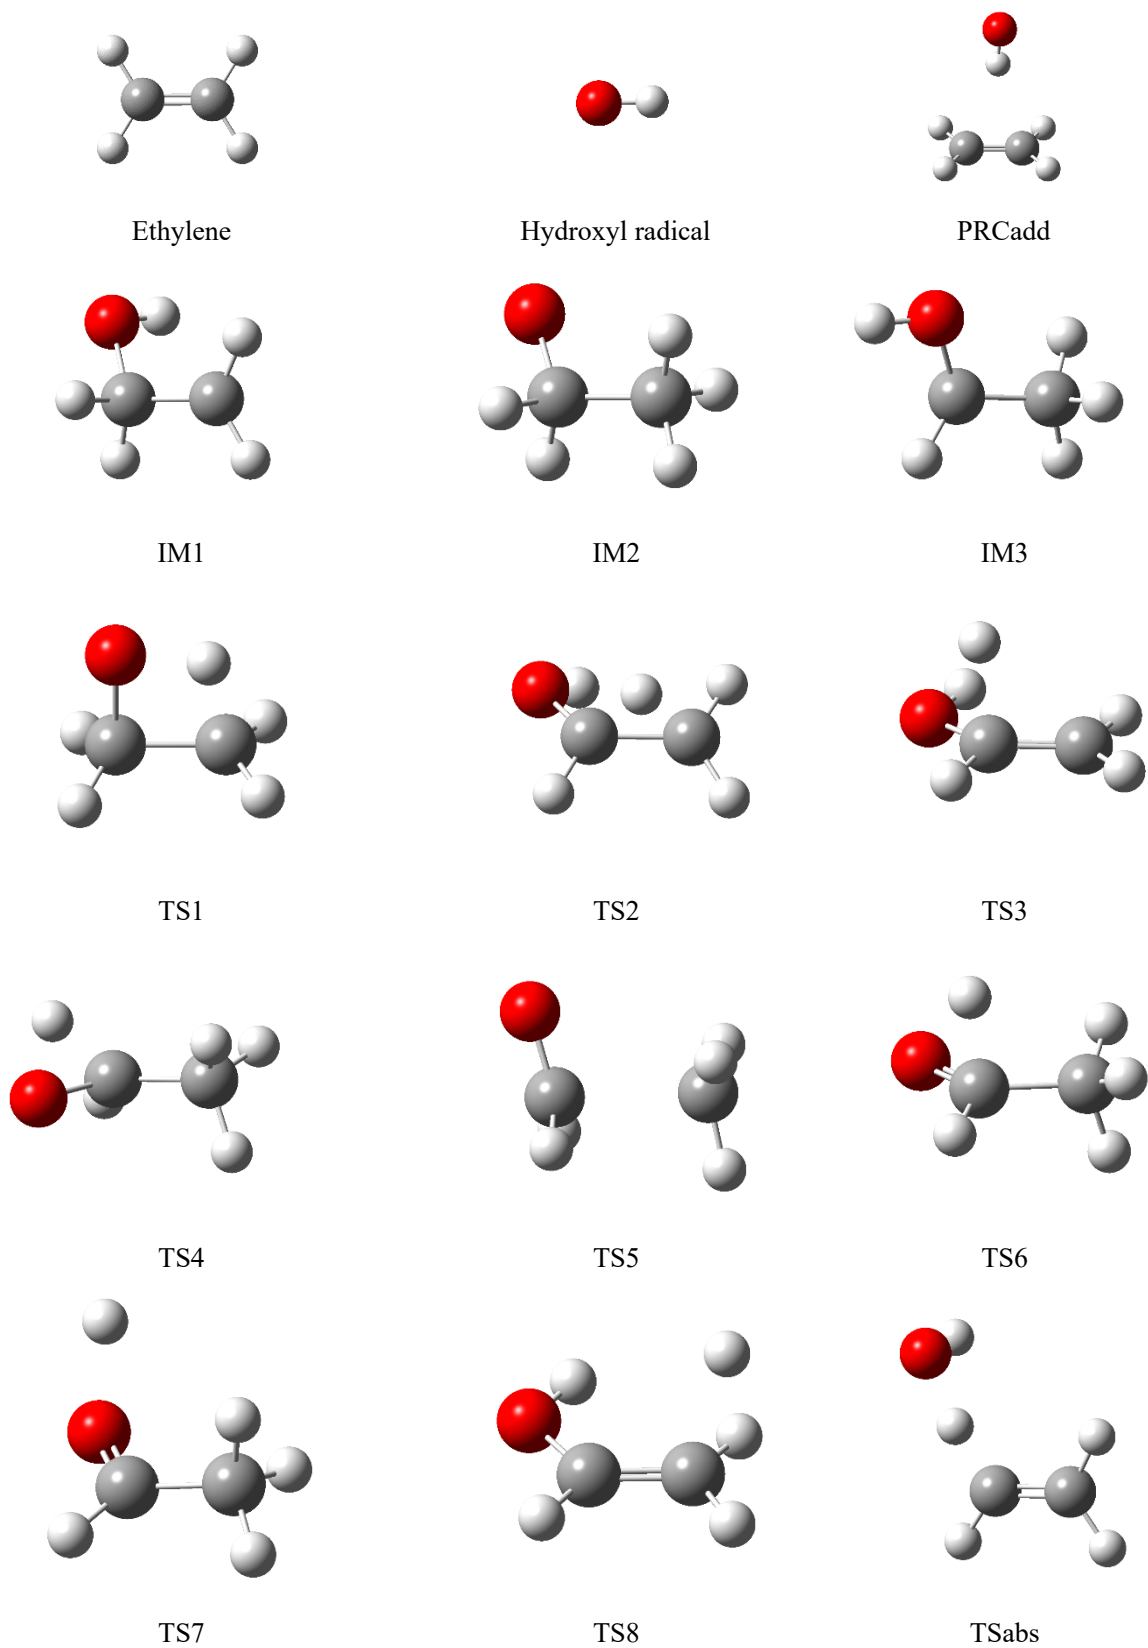



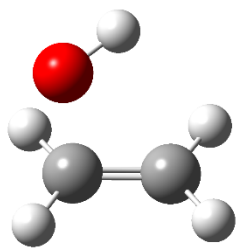

TSadd

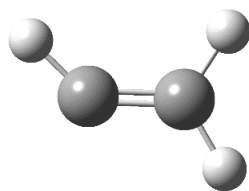

P1(CH<sub>2</sub>CH)

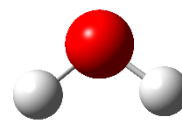

P1(H<sub>2</sub>O)

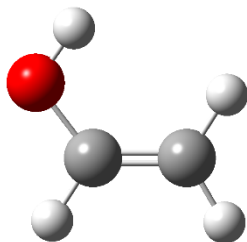

P2(CH<sub>2</sub>CHOH)

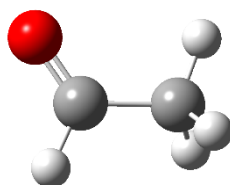

P3(CH<sub>3</sub>CHO)

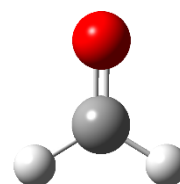

P4(CH<sub>2</sub>O)

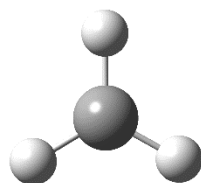

P4(CH<sub>3</sub>)

**Figure S5.** Structures of the minima and transition states present in the PES for the  $\text{CF}_2=\text{CHF} + \text{OH}$  reaction.

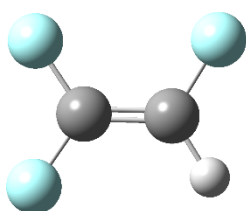

TFE

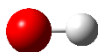

Hydroxyl radical

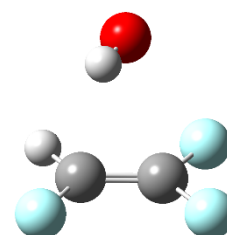

PRCadd

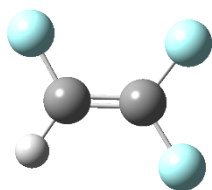

PRCabs

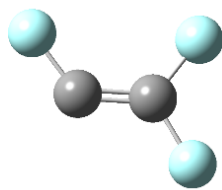

POSTabs

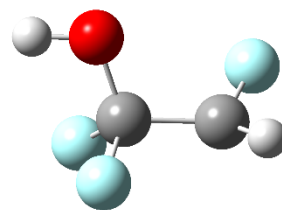

IM1

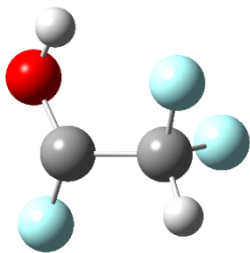

IM2

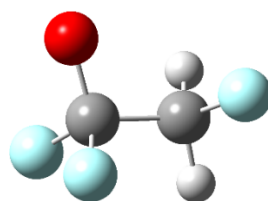

IM3

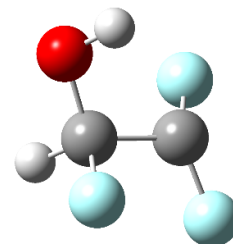

IM4

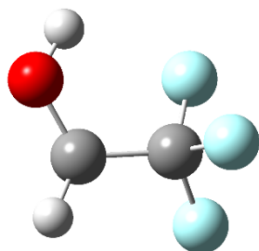

IM5

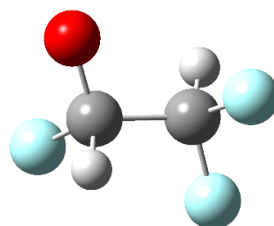

IM6

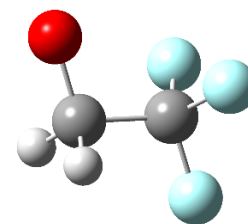

IM7

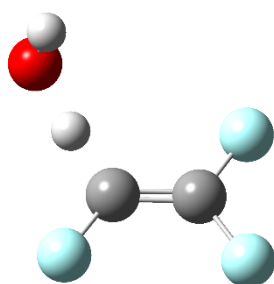

TSabs

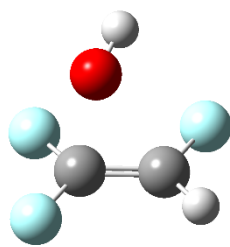

TSadd\_CF2

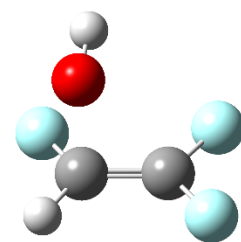

TSadd\_CHF

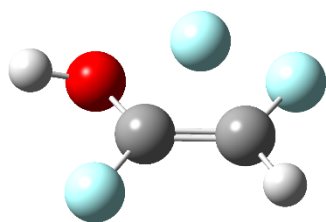

TS1

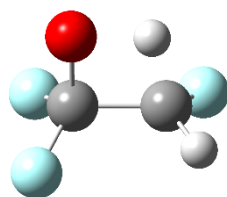

TS2

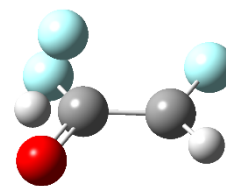

TS3

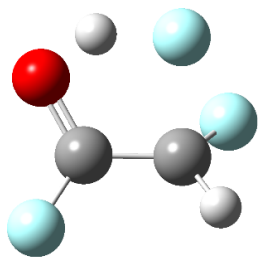

TS4

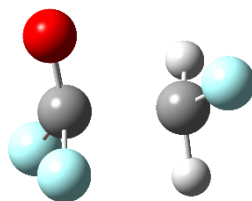

TS5

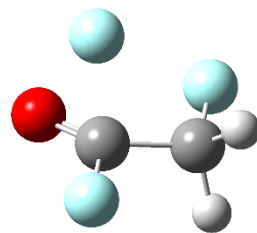

TS6

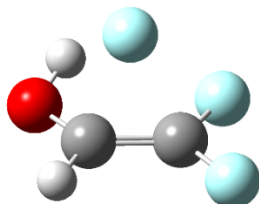

TS7

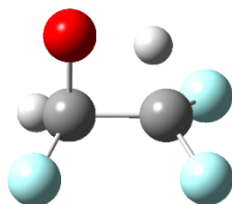

TS8

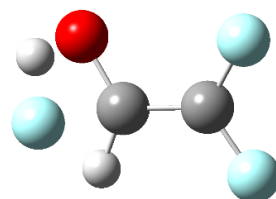

TS9

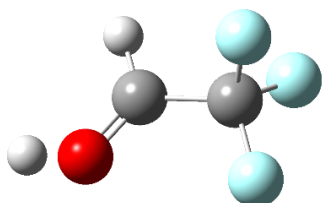

TS10

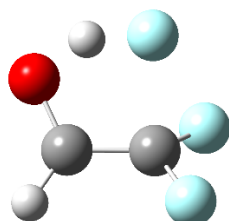

TS11

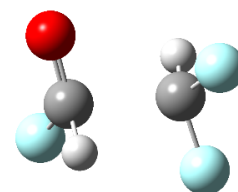

TS12

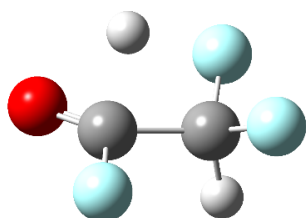

TS13

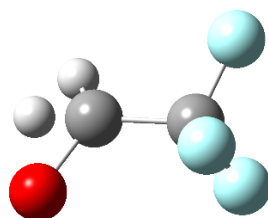

TS14

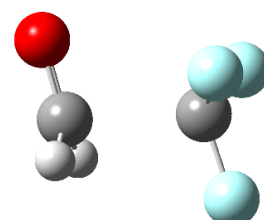

TS15

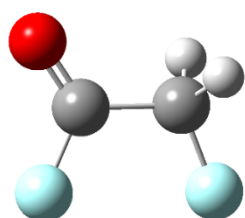

P1(CH<sub>2</sub>FCFO)

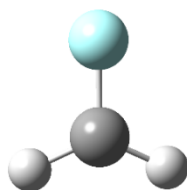

P2(CH<sub>2</sub>F)

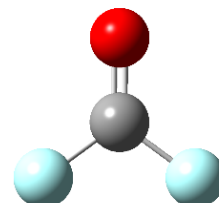

P2(CF<sub>2</sub>O)

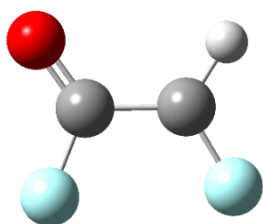

P3(CHFCFO)

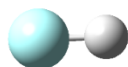

P3(HF)

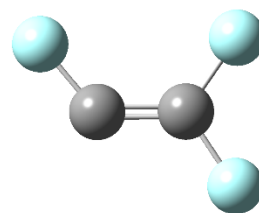

P4(C<sub>2</sub>F<sub>3</sub>)

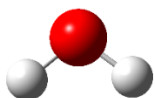

P4(H<sub>2</sub>O)

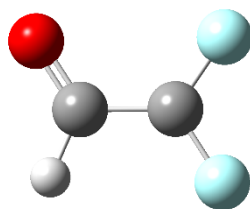

P5(CF<sub>2</sub>CHO)

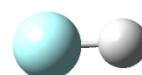

P5(HF)

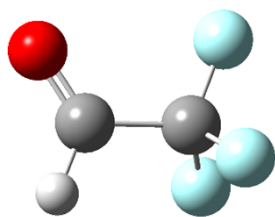

P6(CF<sub>3</sub>CHO)

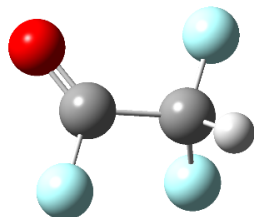

P7(CF<sub>2</sub>HCFO)

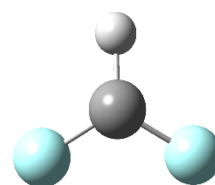

P8(CF<sub>2</sub>H)

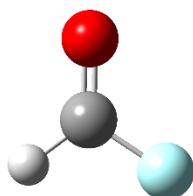

P8(CHFO)

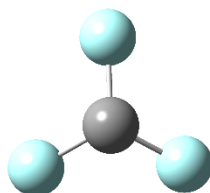

P9(CF<sub>3</sub>)

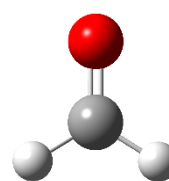

P9(CH<sub>2</sub>O)

**Figure S6.** Structures of the minima and transition states present in the PES for the  $\text{CCl}_2=\text{CHCl} + \text{OH}$  reaction.

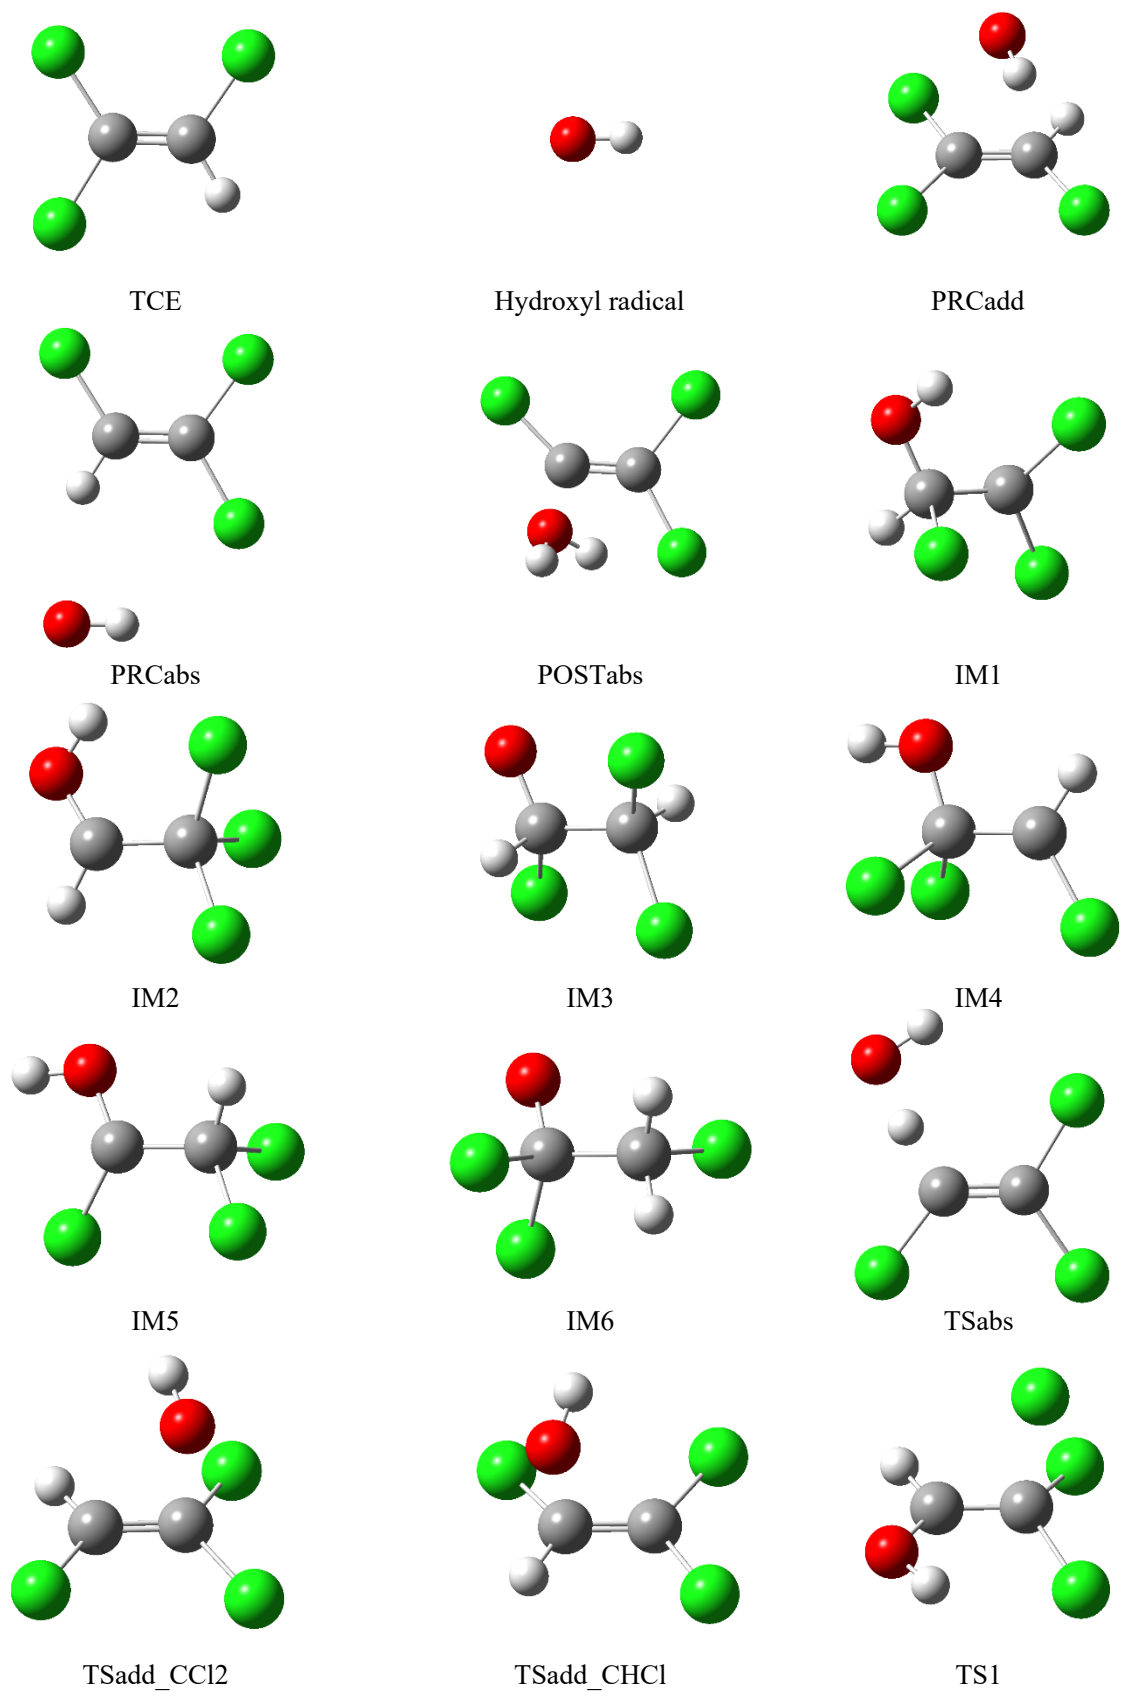

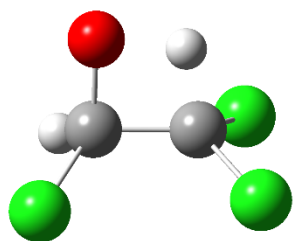

TS2

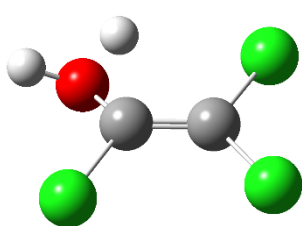

TS3

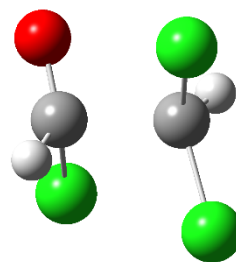

TS4

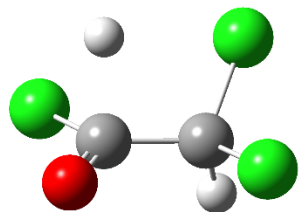

TS5

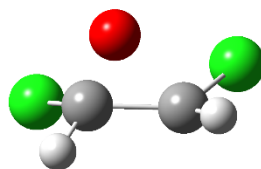

TS6

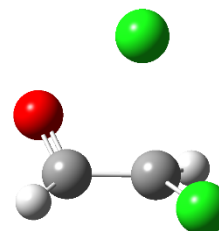

TS7

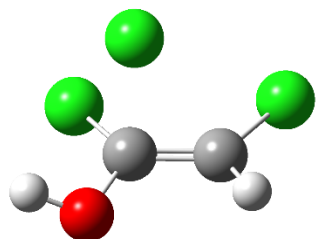

TS8

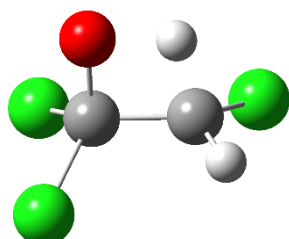

TS9

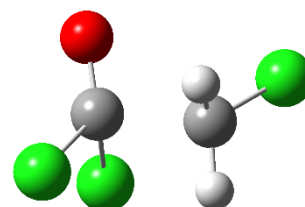

TS10

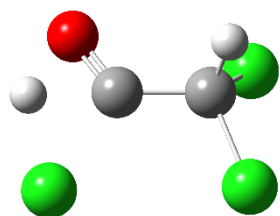

TS11

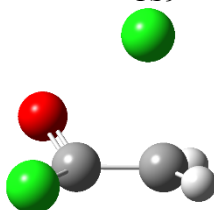

TS12

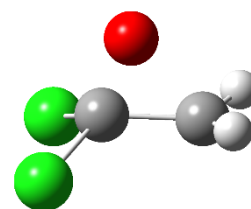

TS13

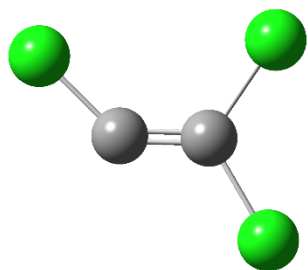

P1(C<sub>2</sub>Cl<sub>3</sub>)

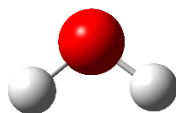

P1(H<sub>2</sub>O)

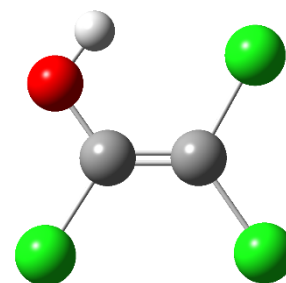

P2(CCl<sub>2</sub>CClOH)

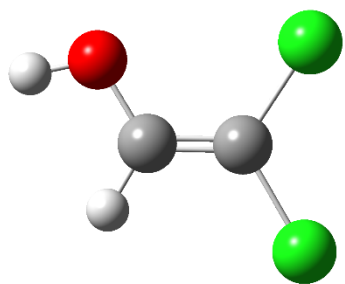

P3(CCl<sub>2</sub>CHOH)

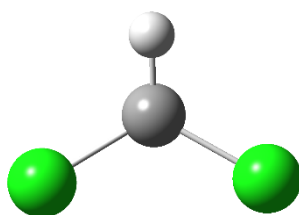

P4(CHCl<sub>2</sub>)

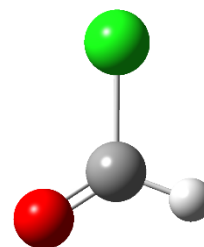

P4(CHClO)

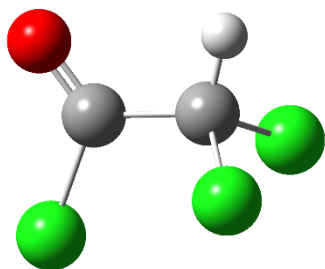

P5(CHCl<sub>2</sub>CClO)

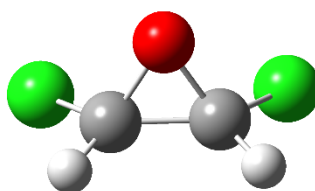

P6(CHCl(O)CHCl)

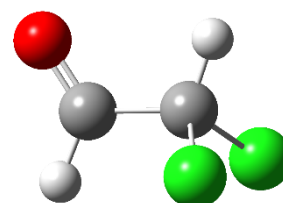

P7(CHCl<sub>2</sub>CHO)

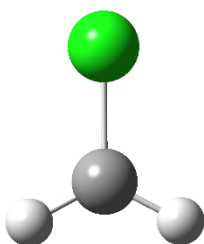

P8(CH<sub>2</sub>Cl)

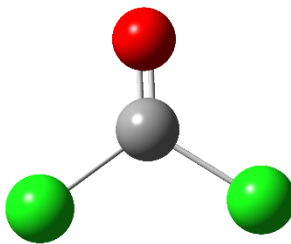

P8(CCl<sub>2</sub>O)

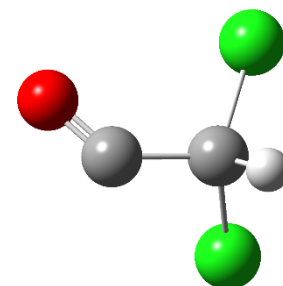

P9(CHCl<sub>2</sub>CO)

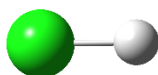

P9(HCl)

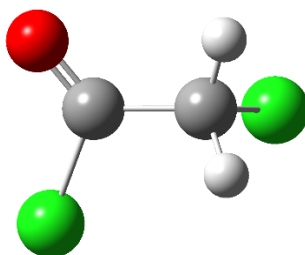

P10(CH<sub>2</sub>ClCClO)

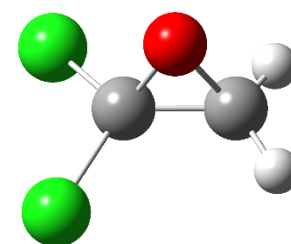

P11(CH<sub>2</sub>(O)CCl<sub>2</sub>)

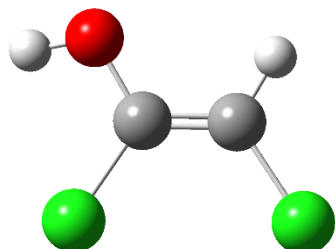

P12(CHClCClOH)

**S2. Cartesian coordinates and harmonic vibrational frequencies of equilibrium geometries at the rev-DSD-PBEP86-D3(BJ)/jun-cc-pV(T+d)Z level of theory**

**I. C<sub>2</sub>H<sub>4</sub> + OH reaction:**

Reactant1 C2H4

Geometry[angstrom]

|   |             |            |             |
|---|-------------|------------|-------------|
| C | 0.00000000  | 0.00000000 | 0.00000000  |
| H | 0.00000000  | 0.00000000 | 1.08618000  |
| H | 0.96976012  | 0.00000000 | -0.48923645 |
| C | -1.12628419 | 0.00000000 | -0.69328844 |
| H | -2.09604397 | 0.00000000 | -0.20405131 |
| H | -1.12629538 | 0.00000000 | -1.77946844 |

Frequencies[1/cm]

3157.35 3132.88 3073.47 3057.03  
 1657.29 1417.49 1337.74 1200.14  
 1032.24 975.26 959.10 799.16

!\*\*\*\*\*

Reactant2 OH

Geometry[angstrom]

|   |            |            |             |
|---|------------|------------|-------------|
| O | 0.00000000 | 0.00000000 | 0.00000000  |
| H | 0.00000000 | 0.00000000 | -0.97015000 |

Frequencies[1/cm]

3700.73

!\*\*\*\*\*

Well PRCadd

Geometry[angstrom]

|   |           |           |           |
|---|-----------|-----------|-----------|
| C | 1.166598  | 0.666956  | 0.000084  |
| C | 1.166599  | -0.666955 | 0.000078  |
| H | 1.169998  | 1.233114  | 0.924107  |
| O | -2.184056 | -0.000001 | -0.000141 |
| H | -1.208158 | 0.000002  | -0.000175 |
| H | 1.170708  | 1.233122  | -0.923931 |
| H | 1.170004  | -1.233121 | 0.924096  |
| H | 1.170711  | -1.233115 | -0.923940 |

Frequencies[1/cm]

3675.08 3255.91 3228.06 3163.81  
 3147.14 1680.73 1485.19 1380.05  
 1248.11 1070.35 997.67 979.10  
 829.60 369.10 304.6717 115.65  
 89.79 69.99

!\*\*\*\*\*

Well IM1

Geometry[angstrom]

|   |           |           |           |
|---|-----------|-----------|-----------|
| C | -1.233575 | -0.272945 | -0.012642 |
| C | 0.008579  | 0.540044  | 0.031808  |
| H | -2.136337 | 0.118401  | -0.460363 |
| O | 1.191797  | -0.257716 | 0.043724  |



|   |           |           |           |
|---|-----------|-----------|-----------|
| H | 1.148794  | -0.849117 | -0.714163 |
| H | -1.285539 | -1.193287 | 0.553266  |
| H | 0.060945  | 1.127918  | 0.956249  |
| H | 0.027740  | 1.255216  | -0.799773 |

Frequencies[1/cm]  
3833.65 3282.28 3169.74 3039.75  
3010.51 1503.38 1472.26 1411.05  
1371.28 1190.61 1132.90 1106.16  
961.08 837.24 530.29 425.3542  
315.93 181.52  
!\*\*\*\*\*

Well IM2

Geometry[angstrom]

|   |           |           |           |
|---|-----------|-----------|-----------|
| C | 1.182345  | -0.199536 | -0.000122 |
| C | -0.173842 | 0.489510  | -0.002933 |
| H | 1.986917  | 0.539066  | 0.032299  |
| O | -1.253525 | -0.365505 | -0.005462 |
| H | -0.310183 | 1.103534  | 0.904759  |
| H | 1.274294  | -0.856015 | 0.866165  |
| H | 1.304320  | -0.800393 | -0.902754 |
| H | -0.278167 | 1.197998  | -0.838445 |

Frequencies[1/cm]  
3139.13 3127.34 3050.95 2997.67  
2954.10 1510.34 1498.64 1416.10  
1407.03 1371.61 1260.70 1105.35  
1071.10 906.33 877.14 473.67  
390.93 225.36  
!\*\*\*\*\*

Well IM3

Geometry[angstrom]

|   |           |           |           |
|---|-----------|-----------|-----------|
| C | -1.225724 | -0.164780 | 0.012291  |
| C | 0.090752  | 0.509181  | -0.103740 |
| H | -1.389922 | -0.575111 | 1.018445  |
| O | 1.164453  | -0.341376 | 0.021062  |
| H | 1.976464  | 0.172732  | 0.000195  |
| H | -1.295409 | -0.996169 | -0.693552 |
| H | 0.233653  | 1.523352  | 0.255858  |
| H | -2.030576 | 0.539802  | -0.200746 |

Frequencies[1/cm]  
3856.61 3161.04 3131.06 3079.60  
2995.10 1502.82 1480.56 1462.89  
1400.72 1285.37 1216.01 1070.63  
1032.30 937.45 600.30 412.54  
371.42 185.11  
!\*\*\*\*\*  
! Transition states  
!\*\*\*\*\*

Barrier TSabs

Geometry[angstrom]

|   |          |          |           |
|---|----------|----------|-----------|
| C | 0.575866 | 0.574539 | -0.019087 |
| H | 0.738329 | 1.639913 | 0.092058  |

|   |           |           |           |
|---|-----------|-----------|-----------|
| H | -0.596972 | 0.274071  | -0.187537 |
| C | 1.472416  | -0.390763 | 0.004080  |
| H | 2.529228  | -0.168230 | 0.119811  |
| H | 1.189320  | -1.430996 | -0.103925 |
| O | -1.791131 | -0.141038 | -0.087562 |
| H | -1.820549 | -0.289106 | 0.870137  |

Frequencies[1/cm]  
3776.75 3233.35 3210.35 3139.00  
1755.32 1430.24 1307.95 1251.43  
1146.46 989.24 935.27 851.35  
807.24 617.21 293.47 153.12  
137.41 -1680.76  
!\*\*\*\*\*

Barrier TSadd  
Geometry[angstrom]  

|   |           |           |           |
|---|-----------|-----------|-----------|
| C | 1.140860  | -0.447201 | -0.029300 |
| C | 0.467460  | 0.714483  | 0.030255  |
| H | 1.356134  | -0.922504 | -0.977485 |
| O | -1.459845 | -0.153587 | -0.055686 |
| H | -1.305634 | -0.972184 | 0.441130  |
| H | 1.456705  | -0.961049 | 0.870708  |
| H | 0.222203  | 1.264044  | -0.867406 |
| H | 0.299434  | 1.216694  | 0.972814  |

Frequencies[1/cm]  
3765.10 3281.59 3249.70 3185.05  
3160.60 1658.77 1486.40 1372.22  
1253.80 1062.41 1032.16 964.53  
833.23 711.60 380.65 222.48  
97.87 -378.66  
!\*\*\*\*\*

Barrier TS1  
Geometry[angstrom]  

|   |           |           |           |
|---|-----------|-----------|-----------|
| C | -0.977200 | -0.422125 | 0.000000  |
| C | 0.000000  | 0.712664  | 0.000000  |
| H | -1.487365 | -0.658600 | 0.926683  |
| O | 1.082926  | -0.246403 | 0.000000  |
| H | 0.159810  | -1.115340 | 0.000000  |
| H | -1.487365 | -0.658600 | -0.926683 |
| H | 0.007358  | 1.330269  | 0.898392  |
| H | 0.007358  | 1.330269  | -0.898392 |

Frequencies[1/cm]  
3251.24 3137.69 3131.07 3075.4871  
1987.36 1539.09 1439.89 1316.8692  
1230.11 1161.98 1115.08 1095.9892  
995.98 940.48 824.88 726.81  
384.82 -2134.69  
!\*\*\*\*\*

Barrier TS2  
Geometry[angstrom]  

|   |           |           |           |
|---|-----------|-----------|-----------|
| C | -1.227267 | -0.239404 | -0.033737 |
| C | 0.047151  | 0.502998  | 0.025244  |

|   |           |           |           |
|---|-----------|-----------|-----------|
| H | -2.077424 | 0.175220  | -0.556548 |
| O | 1.249168  | -0.174235 | 0.019952  |
| H | 1.115244  | -1.018718 | -0.429392 |
| H | -1.221190 | -1.285126 | 0.240871  |
| H | -0.804012 | 0.430495  | 1.007884  |
| H | 0.074729  | 1.510445  | -0.371471 |

Frequencies[1/cm]  
3754.72 3283.62 3182.35 3163.25  
2216.60 1446.73 1405.47 1331.35  
1301.83 1215.57 1089.71 934.39  
774.69 686.97 441.20 405.63  
257.78 -1977.76  
!\*\*\*\*\*

Barrier TS3

Geometry[angstrom]

|   |           |           |           |
|---|-----------|-----------|-----------|
| C | -1.196931 | -0.267678 | -0.025597 |
| C | -0.026830 | 0.393325  | -0.140221 |
| H | -2.123672 | 0.262358  | -0.185775 |
| O | 1.209723  | -0.165579 | -0.037452 |
| H | 1.121562  | -1.059699 | 0.310578  |
| H | -1.240757 | -1.293261 | 0.319973  |
| H | -0.120999 | 1.281539  | 1.430984  |
| H | 0.028646  | 1.379815  | -0.581237 |

Frequencies[1/cm]  
3823.14 3279.39 3217.89 3171.4923  
1633.89 1456.83 1352.13 1323.9516  
1124.48 1080.59 964.17 836.9144  
695.67 520.13 509.38 456.6279  
400.73 -1165.971  
!\*\*\*\*\*

Barrier TS4

Geometry[angstrom]

|   |           |           |           |
|---|-----------|-----------|-----------|
| C | -1.217866 | -0.174188 | -0.000997 |
| C | 0.127227  | 0.477631  | -0.029690 |
| H | -1.990250 | 0.512306  | -0.352024 |
| O | 1.255220  | -0.316063 | 0.088983  |
| H | 0.958449  | 0.240720  | -0.947270 |
| H | -1.225930 | -1.075849 | -0.613736 |
| H | -1.460853 | -0.463252 | 1.028211  |
| H | 0.220656  | 1.493913  | 0.357077  |

Frequencies[1/cm]  
3145.83 3105.54 3094.72 3028.39  
2454.54 1495.26 1486.13 1416.46  
1370.53 1193.69 1127.09 1078.23  
915.77 897.37 623.89 429.1405  
194.51 -2042.9926  
!\*\*\*\*\*

Barrier TS5

Geometry[angstrom]

|   |           |           |          |
|---|-----------|-----------|----------|
| C | 1.451622  | -0.171158 | 0.000000 |
| C | -0.530411 | 0.547659  | 0.000000 |

|   |           |           |           |
|---|-----------|-----------|-----------|
| H | 1.989906  | 0.768712  | 0.000009  |
| O | -1.213066 | -0.471678 | 0.000000  |
| H | -0.341787 | 1.109540  | 0.931601  |
| H | 1.435465  | -0.736695 | 0.920894  |
| H | 1.435469  | -0.736680 | -0.920903 |
| H | -0.341789 | 1.109542  | -0.931601 |

Frequencies[1/cm]  
3289.89 3275.06 3109.46 2978.09  
2921.11 1664.46 1499.73 1449.47  
1433.61 1252.83 1138.48 934.82  
667.47 593.93 552.65 296.38  
149.64 -499.3037  
!\*\*\*\*\*

Barrier TS6

Geometry[angstrom]

|   |           |           |           |
|---|-----------|-----------|-----------|
| C | -1.185082 | -0.169273 | 0.032266  |
| C | 0.225316  | 0.331397  | -0.184516 |
| H | -1.878174 | 0.651660  | 0.220145  |
| O | 1.217950  | -0.338998 | 0.053662  |
| H | 0.313960  | 1.243295  | -0.811258 |
| H | -1.496498 | -0.670781 | -0.889601 |
| H | -1.211548 | -0.889527 | 0.848371  |
| H | 0.287261  | 1.404592  | 1.116540  |

Frequencies[1/cm]  
3164.90 3123.76 3047.07 2895.12  
1741.33 1489.51 1479.12 1408.62  
1386.30 1161.56 1119.52 922.19  
836.60 541.78 513.73 457.06  
190.96 -1271.15  
!\*\*\*\*\*

Barrier TS7

Geometry[angstrom]

|   |           |           |           |
|---|-----------|-----------|-----------|
| C | 1.206872  | -0.186105 | 0.024751  |
| C | -0.124363 | 0.482545  | -0.044271 |
| H | 2.012255  | 0.529173  | 0.192321  |
| O | -1.181181 | -0.121410 | 0.149192  |
| H | -1.489209 | -1.231528 | -0.734361 |
| H | 1.212010  | -0.959894 | 0.791597  |
| H | 1.379519  | -0.674196 | -0.944931 |
| H | -0.160182 | 1.529084  | -0.381049 |

Frequencies[1/cm]  
3161.99 3110.09 3016.30 3010.64  
1730.67 1489.49 1465.94 1414.08  
1383.42 1133.54 1109.52 949.26  
765.79 654.87 487.50 229.24  
53.30 -1999.20  
!\*\*\*\*\*

Barrier TS8

Geometry[angstrom]

|   |           |           |           |
|---|-----------|-----------|-----------|
| C | -1.132227 | -0.104779 | -0.196526 |
|---|-----------|-----------|-----------|

|   |           |           |           |
|---|-----------|-----------|-----------|
| C | 0.057531  | 0.471732  | 0.016389  |
| H | -1.213889 | -1.133293 | -0.527063 |
| O | 1.258658  | -0.153531 | 0.026478  |
| H | 1.129180  | -1.089284 | -0.167608 |
| H | -1.678747 | -0.780903 | 1.535273  |
| H | -2.018707 | 0.510286  | -0.236209 |
| H | 0.161072  | 1.519721  | 0.264605  |

Frequencies[1/cm] 17  
3811.29 3274.64 3224.75 3168.95  
1692.67 1458.09 1358.79 1338.73  
1137.05 1019.83 970.51 923.32  
795.73 497.35 492.54 375.89  
259.65 -823.49

!\*\*\*\*\*

! Products

!\*\*\*\*\*

Bimolecular P1

Fragment1 CH2CH

Geometry[angstrom]

|   |           |           |           |
|---|-----------|-----------|-----------|
| C | -0.703496 | -0.145551 | 0.000000  |
| H | -1.592782 | 0.465911  | -0.000001 |
| C | 0.585470  | 0.030029  | 0.000000  |
| H | 1.020042  | 1.030514  | 0.000001  |
| H | 1.280894  | -0.803288 | 0.000000  |

Frequencies[1/cm]

3264.21 3189.26 3088.38 1772.51 1415.02 1071.81  
964.48 855.87 723.55

!\*\*\*\*\*

Fragment2 H2O

Geometry[angstrom]

|   |          |           |           |
|---|----------|-----------|-----------|
| O | 0.000000 | 0.000000  | 0.117724  |
| H | 0.000000 | 0.759692  | -0.470895 |
| H | 0.000000 | -0.759692 | -0.470895 |

Frequencies[1/cm]

3938.88 3824.01 1644.89

!\*\*\*\*\*

Bimolecular P2

Fragment1 HOCHCH2

Geometry[angstrom]

|   |           |           |          |
|---|-----------|-----------|----------|
| C | 1.212835  | -0.108845 | 0.000000 |
| C | 0.000000  | 0.444309  | 0.000000 |
| H | 2.087788  | 0.524084  | 0.000000 |
| O | -1.192862 | -0.213364 | 0.000000 |
| H | -1.024878 | -1.162488 | 0.000000 |
| H | 1.355193  | -1.183552 | 0.000000 |
| H | -0.152214 | 1.516084  | 0.000000 |

Frequencies[1/cm]

3817.08 3269.82 3216.35 3163.90  
1702.39 1456.43 1356.52 1331.15  
1123.44 999.94 962.98 829.9663  
716.33 487.98 446.97

!\*\*\*\*\*  
 Fragment2 H  
 Atom  
 !\*\*\*\*\*

Bimolecular P3  
 Fragment1 OCHCH3  
 RRHO  
 Geometry[angstrom]  
 C -1.167047 -0.149307 -0.000004  
 C 0.230605 0.400124 -0.000002  
 H -1.702296 0.221714 -0.878770  
 O 1.233658 -0.277052 0.000000  
 H 0.307129 1.505890 0.000004  
 H -1.153221 -1.237690 -0.000058  
 H -1.702222 0.221604 0.878859

Frequencies[1/cm]  
 3165.25 3110.72 3044.26 2922.88  
 1789.19 1485.22 1474.17 1428.00  
 1389.96 1140.26 1138.38 899.13  
 778.13 507.49 158.00

!\*\*\*\*\*  
 Fragment2 H  
 Atom  
 !\*\*\*\*\*

Bimolecular P4  
 Fragment1 CH2O  
 Geometry[angstrom]  
 C 0.000000 0.000000 -0.530899  
 O 0.000000 0.000000 0.676285  
 H 0.000000 0.938533 -1.112441  
 H 0.000000 -0.938533 -1.112441

Frequencies[1/cm]  
 3001.58 2935.61 1783.59 1538.25  
 1268.07 1199.36

!\*\*\*\*\*  
 Fragment2 CH3  
 Geometry[angstrom]  
 C 0.000000 0.000000 0.000000  
 H 0.433510 0.987390 0.000000  
 H 0.638350 -0.869125 0.000000  
 H -1.071860 -0.118264 0.000000

Frequencies[1/cm]  
 3319.40 3319.40 3136.92 1430.32  
 1430.32 501.29

## II. CF<sub>2</sub>=CHF + OH reaction:

Reactant1 CF<sub>2</sub>=CHF  
 Geometry[angstrom]  
 C 0.00000000 0.00000000 0.00000000

|   |             |            |             |
|---|-------------|------------|-------------|
| H | 0.00000000  | 0.00000000 | 1.08038000  |
| F | 1.19402608  | 0.00000000 | -0.60246761 |
| C | -1.10425239 | 0.00000000 | -0.71665074 |
| F | -2.30955047 | 0.00000000 | -0.18684690 |
| F | -1.14803019 | 0.00000000 | -2.02813028 |

Frequencies[1/cm]  
3177.73 1819.60 1345.90 1251.84  
1158.33 931.11 800.92 615.46  
594.72 476.25 309.89 218.83  
!\*\*\*\*\*

Reactant2 OH  
Geometry[angstrom]  

|   |            |            |             |
|---|------------|------------|-------------|
| O | 0.00000000 | 0.00000000 | 0.00000000  |
| H | 0.00000000 | 0.00000000 | -0.97015000 |

Frequencies[1/cm]  
3700.73  
!\*\*\*\*\*

Well PRCadd  
Geometry[angstrom]  

|   |           |           |           |
|---|-----------|-----------|-----------|
| C | -0.603028 | -0.459741 | -0.701026 |
| C | 0.571387  | -0.326831 | -0.091530 |
| F | -1.656300 | -0.947702 | -0.027874 |
| H | -0.772429 | -0.184916 | -1.728281 |
| F | 1.639331  | 0.138791  | -0.693875 |
| F | 0.806099  | -0.653532 | 1.156025  |
| O | -0.604613 | 2.044197  | 0.220661  |
| H | -1.302991 | 1.712762  | 0.809840  |

Frequencies[1/cm]  
3751.61 3286.66 1804.85 1390.88  
1295.84 1178.72 947.51 777.22  
630.45 593.89 489.74 425.45  
313.99 234.67 162.19 89.03  
63.53 49.76  
!\*\*\*\*\*

Well PRCabs  
Geometry[angstrom]  

|   |           |           |           |
|---|-----------|-----------|-----------|
| C | -0.997506 | 0.211970  | 0.000000  |
| C | -0.798643 | -1.098134 | -0.000008 |
| F | 0.048975  | 1.047863  | -0.000079 |
| H | -1.979711 | 0.656621  | 0.000061  |
| F | -1.792301 | -1.975959 | 0.000045  |
| F | 0.369684  | -1.695838 | -0.000080 |
| O | -4.360786 | -0.184799 | -0.000033 |
| H | -4.069968 | -1.113147 | -0.000104 |

Frequencies[1/cm]  
3745.18 3274.36 1835.28 1387.21  
1273.51 1184.04 944.18 810.06  
627.65 575.55 488.41 314.55  
241.54 226.74 110.19 90.83  
60.69 32.38  
!\*\*\*\*\*

Well POSTabs

Geometry[angstrom]

|   |           |           |           |
|---|-----------|-----------|-----------|
| C | 0.338198  | 0.824248  | -0.176454 |
| C | 0.582701  | -0.451933 | -0.052228 |
| F | 1.139293  | 1.838829  | -0.022091 |
| H | -3.744262 | 0.352358  | 0.115914  |
| F | -0.335295 | -1.387413 | -0.227771 |
| F | 1.754720  | -0.983756 | 0.251513  |
| O | -2.784068 | 0.346592  | 0.156298  |
| H | -2.537047 | -0.567920 | -0.009062 |

Frequencies[1/cm]

3935.08 3820.63 1980.43 1641.59  
1294.41 1252.97 949.23 627.73  
571.73 491.12 310.07 217.42  
172.86 139.34 79.90 54.64  
44.92 9.05

!\*\*\*\*\*

Well IM1

Geometry[angstrom]

|   |           |           |           |
|---|-----------|-----------|-----------|
| C | 0.959183  | 0.687849  | -0.061253 |
| C | -0.377511 | 0.024771  | -0.015271 |
| F | 2.001977  | -0.129520 | 0.030183  |
| H | 1.117837  | 1.601634  | -0.614217 |
| F | -1.326093 | 1.001891  | -0.058350 |
| F | -0.560838 | -0.617511 | 1.173164  |
| O | -0.535789 | -0.853445 | -1.041353 |
| H | -1.356969 | -1.343534 | -0.900775 |

Frequencies[1/cm]

3793.40 3251.36 1504.49 1354.20  
1235.73 1204.95 1112.72 1104.98  
865.41 661.95 617.88 557.18  
503.11 430.02 333.62 290.95  
219.23 79.46

!\*\*\*\*\*

Well IM2

Geometry[angstrom]

|   |           |           |           |
|---|-----------|-----------|-----------|
| C | -0.689454 | -0.323074 | -0.356560 |
| C | 0.725185  | 0.183834  | -0.330326 |
| F | -1.514689 | 0.759883  | -0.449159 |
| H | -0.876593 | -0.997303 | -1.190731 |
| F | 1.630443  | -0.793945 | -0.329930 |
| F | -1.014593 | -0.969104 | 0.801194  |
| O | 1.051975  | 1.134839  | 0.564767  |
| H | 0.335954  | 1.782521  | 0.594955  |

Frequencies[1/cm]

3811.74 3145.55 1464.18 1384.32  
1365.03 1334.54 1149.71 1106.01  
1063.68 891.89 745.70 594.53  
535.30 421.21 343.66 240.66  
215.58 82.08

!\*\*\*\*\*



Well IM3

Geometry[angstrom]

|   |           |           |           |
|---|-----------|-----------|-----------|
| C | -0.888588 | -0.711335 | -0.177267 |
| C | 0.440128  | 0.025042  | 0.062812  |
| F | -1.944373 | 0.144174  | -0.020166 |
| H | -0.852544 | -1.069376 | -1.207978 |
| F | 0.563502  | 1.087995  | -0.760669 |
| F | 1.444306  | -0.832481 | -0.265956 |
| O | 0.493776  | 0.391646  | 1.349382  |
| H | -0.977814 | -1.543214 | 0.520772  |

Frequencies[1/cm]

3158.26 3086.58 1500.03 1415.86  
1322.15 1220.75 1157.24 1130.51  
1124.67 918.47 847.79 620.51  
537.43 506.95 386.51 330.83  
220.21 105.41

!\*\*\*\*\*

Well IM4

Geometry[angstrom]

|   |           |           |           |
|---|-----------|-----------|-----------|
| C | -0.704618 | 0.003003  | 0.331854  |
| C | 0.695297  | -0.027736 | -0.249503 |
| F | -1.278195 | 1.181345  | -0.094087 |
| H | -0.680614 | 0.019239  | 1.424974  |
| F | 1.379794  | -1.123876 | 0.049695  |
| F | 1.420652  | 1.053748  | -0.016666 |
| O | -1.446334 | -1.085922 | -0.045660 |
| H | -1.393047 | -1.184408 | -1.004280 |

Frequencies[1/cm]

3805.08 3086.96 1462.73 1386.70  
1326.03 1263.40 1259.53 1162.13  
1068.32 962.80 643.38 556.76  
497.04 424.65 384.79 332.68  
212.36 72.08

!\*\*\*\*\*

Well IM5

Geometry[angstrom]

|   |           |           |           |
|---|-----------|-----------|-----------|
| C | -0.911289 | -0.729553 | -0.158963 |
| C | 0.393780  | -0.037218 | -0.014764 |
| F | 0.753919  | 0.180168  | 1.270922  |
| H | -0.980714 | -1.781086 | 0.069390  |
| F | 1.379210  | -0.738239 | -0.582084 |
| F | 0.345712  | 1.183450  | -0.596105 |
| O | -2.043214 | -0.019640 | 0.037720  |
| H | -1.878092 | 0.910414  | -0.163382 |

Frequencies[1/cm]

3800.34 3265.42 1496.63 1363.04  
1264.49 1220.92 1162.43 1107.95  
849.52 682.94 637.44 558.15  
536.70 454.16 429.06 312.74  
230.46 89.06

!\*\*\*\*\*

Well IM6

Geometry[angstrom]

|   |           |           |           |
|---|-----------|-----------|-----------|
| C | -0.672427 | -0.010793 | 0.334317  |
| C | 0.740567  | 0.098431  | -0.285024 |
| F | -1.246704 | -1.149913 | -0.108232 |
| H | -0.641970 | -0.022594 | 1.424174  |
| F | 1.431483  | -1.036777 | 0.082936  |
| F | -1.414949 | 1.032161  | -0.092238 |
| O | 1.332752  | 1.222501  | 0.090129  |
| H | 0.642649  | 0.107516  | -1.383151 |

Frequencies[1/cm]

3130.49 2985.77 1396.26 1381.92  
1287.99 1192.93 1156.89 1149.47  
1113.51 1062.31 982.26 629.27  
556.38 459.36 400.54 361.14  
218.27 78.98

!\*\*\*\*\*

Well IM7

Geometry[angstrom]

|   |           |           |           |
|---|-----------|-----------|-----------|
| C | -0.369331 | 0.003178  | 0.000002  |
| C | 0.969279  | 0.748384  | 0.000017  |
| F | -1.365402 | 0.899336  | 0.000010  |
| H | 0.979649  | 1.366532  | 0.903808  |
| F | -0.507347 | -0.768292 | -1.080454 |
| F | -0.507364 | -0.768334 | 1.080424  |
| O | 1.982753  | -0.188359 | -0.000001 |
| H | 0.979648  | 1.366577  | -0.903743 |

Frequencies[1/cm]

3100.49 3033.94 1523.73 1494.30  
1348.59 1302.22 1267.41 1184.72  
1104.40 1025.45 836.02 643.00  
552.94 540.86 409.26 353.29  
231.53 119.11

!\*\*\*\*\*

! Transition states

!\*\*\*\*\*

Barrier TSabs

Geometry[angstrom]

|   |           |           |           |
|---|-----------|-----------|-----------|
| C | 0.335787  | 0.480548  | -0.092784 |
| C | -0.761813 | -0.246323 | -0.012138 |
| F | -0.764810 | -1.558158 | -0.055584 |
| H | 1.471637  | -0.090742 | -0.230240 |
| F | -1.977503 | 0.244882  | 0.088200  |
| F | 0.362912  | 1.798485  | -0.013199 |
| O | 2.501451  | -0.618406 | -0.030822 |
| H | 2.487517  | -0.734242 | 0.931583  |

Frequencies[1/cm]

3781.01 1926.80 1372.99 1337.23  
1242.36 1044.07 975.94 762.85  
647.46 583.26 492.74 407.84

283.17 229.78 116.04 104.00  
81.30 -1982.43

!\*\*\*\*\*

Barrier TSadd-CF<sub>2</sub>

Geometry[angstrom]

|   |           |           |           |
|---|-----------|-----------|-----------|
| C | -0.791502 | -0.109526 | -0.696306 |
| C | 0.387020  | -0.354207 | -0.102026 |
| F | -1.923326 | -0.266988 | -0.010480 |
| H | -0.877768 | 0.259634  | -1.703897 |
| F | 1.515949  | -0.314592 | -0.751718 |
| F | 0.505746  | -0.862642 | 1.093122  |
| O | 0.350431  | 1.716897  | 0.320607  |
| H | -0.384103 | 1.785600  | 0.950714  |

Frequencies[1/cm]

3764.64 3293.03 1775.24 1409.98  
1308.96 1193.16 968.42 784.61  
733.18 639.29 493.18 481.48  
355.16 261.70 244.52 174.08  
141.00 -386.28

!\*\*\*\*\*

Barrier TSadd-CHF

Geometry[angstrom]

|   |           |           |           |
|---|-----------|-----------|-----------|
| C | 0.596417  | -0.132691 | -0.653131 |
| C | -0.641465 | -0.165035 | -0.140554 |
| F | 1.497754  | -1.021005 | -0.238339 |
| H | 0.842031  | 0.435910  | -1.533077 |
| F | -1.601990 | 0.612078  | -0.556963 |
| F | -1.002092 | -0.918385 | 0.863983  |
| O | 1.020864  | 1.532868  | 0.541034  |
| H | 1.218286  | 1.033301  | 1.348797  |

Frequencies[1/cm]

3764.22 3295.02 1780.41 1408.40  
1313.48 1193.85 967.30 888.32  
756.01 635.59 563.57 493.74  
310.68 238.91 211.49 136.01  
104.70 -433.23

!\*\*\*\*\*

Barrier TS1

Geometry[angstrom]

|   |           |           |           |
|---|-----------|-----------|-----------|
| C | 0.502515  | -0.235312 | -0.181459 |
| C | -0.759936 | 0.082840  | -0.627340 |
| F | -0.313889 | 1.384165  | 0.828499  |
| F | -1.792154 | -0.577481 | -0.161967 |
| O | 0.746469  | -1.177502 | 0.691599  |
| H | 1.597851  | -1.011283 | 1.120511  |
| F | 1.540516  | 0.365864  | -0.709101 |
| H | -0.935337 | 0.793193  | -1.417385 |

Frequencies[1/cm]

3787.38 3291.05 1761.82 1472.07  
1354.81 1240.21 1188.81 960.31  
806.44 618.02 558.85 486.43

411.93 304.34 254.19 245.63  
167.76 -273.79

!\*\*\*\*\*

#### Barrier TS2

##### Geometry[angstrom]

|   |           |           |           |
|---|-----------|-----------|-----------|
| C | -0.903702 | -0.520585 | 0.347233  |
| C | 0.457565  | 0.007887  | -0.013098 |
| F | -1.961499 | 0.259769  | 0.120289  |
| H | -0.986473 | -1.143656 | 1.234927  |
| F | 1.391295  | -0.050257 | 0.956756  |
| F | 0.474362  | 1.257799  | -0.500398 |
| O | 0.637871  | -0.958161 | -0.972047 |
| H | -0.577097 | -1.320676 | -0.653186 |

##### Frequencies[1/cm]

3163.11 2035.70 1434.90 1293.52  
1189.54 1186.03 1168.73 1124.36  
929.33 863.93 680.41 632.15  
523.90 481.64 357.23 221.73  
150.95 -2128.58

!\*\*\*\*\*

#### Barrier TS3

##### Geometry[angstrom]

|   |           |           |           |
|---|-----------|-----------|-----------|
| C | -0.959472 | -0.404905 | 0.569181  |
| C | 0.247859  | 0.284413  | 0.239505  |
| F | -2.029374 | -0.208040 | -0.159410 |
| H | -0.996013 | -1.189707 | 1.307351  |
| F | 0.111703  | 1.276019  | -0.601127 |
| F | 1.165470  | -1.002809 | -0.827404 |
| O | 1.289369  | 0.227404  | 0.984857  |
| H | 1.720551  | -0.493105 | 0.253132  |

##### Frequencies[1/cm]

3281.77 2208.83 1602.67 1451.79  
1338.47 1232.06 938.49 907.90  
813.57 658.55 590.60 531.22  
481.98 349.03 249.21 175.76  
118.62 -1443.00

!\*\*\*\*\*

#### Barrier TS4

##### Geometry[angstrom]

|   |           |           |           |
|---|-----------|-----------|-----------|
| C | 0.453932  | -0.698996 | 0.315796  |
| C | -0.736930 | -0.077370 | -0.113768 |
| F | 1.399067  | -0.959010 | -0.564995 |
| H | 0.487521  | -1.303634 | 1.211849  |
| F | 1.205563  | 1.039826  | 0.655525  |
| F | -1.897089 | -0.480412 | 0.348401  |
| O | -0.677354 | 1.026690  | -0.754002 |
| H | 0.261423  | 1.344670  | -0.342381 |

##### Frequencies[1/cm]

3241.61 2286.57 1673.64 1509.85  
1319.24 1251.59 1129.38 996.37  
967.68 860.02 651.59 505.28

466.05 448.69 341.32 253.83  
143.33 -753.49

!\*\*\*\*\*

#### Barrier TS5

##### Geometry[angstrom]

|   |           |           |           |
|---|-----------|-----------|-----------|
| C | 1.038210  | 0.699366  | -0.209211 |
| C | -0.610993 | -0.102538 | 0.164324  |
| F | 2.004294  | -0.186355 | -0.017017 |
| H | 0.859240  | 0.906969  | -1.261906 |
| F | -0.651966 | -1.059520 | -0.785130 |
| F | -1.409598 | 0.901314  | -0.275502 |
| O | -0.496321 | -0.364012 | 1.342166  |
| H | 1.063459  | 1.525206  | 0.492752  |

##### Frequencies[1/cm]

3248.29 3108.29 1622.66 1497.30  
1225.94 1221.12 1165.03 1113.61  
889.66 785.75 630.46 577.44  
538.90 321.26 278.62 193.28  
86.71 -536.39

!\*\*\*\*\*

#### Barrier TS6

##### Geometry[angstrom]

|   |           |           |           |
|---|-----------|-----------|-----------|
| C | -0.975272 | -0.644705 | -0.313633 |
| C | 0.370669  | -0.240664 | 0.238398  |
| F | -1.938927 | 0.227583  | 0.097340  |
| H | -0.919260 | -0.661896 | -1.402128 |
| F | 0.750164  | 1.263443  | -0.750580 |
| F | 1.305105  | -1.079761 | -0.204176 |
| O | 0.587478  | 0.489906  | 1.188430  |
| H | -1.200011 | -1.646523 | 0.062837  |

##### Frequencies[1/cm]

3144.72 3077.00 1652.41 1487.81  
1433.67 1276.32 1192.06 1145.72  
999.20 886.03 641.04 483.45  
464.26 308.06 247.20 206.95  
102.98 -738.18

!\*\*\*\*\*

#### Barrier TS7

##### Geometry[angstrom]

|   |           |           |           |
|---|-----------|-----------|-----------|
| C | 0.704531  | 0.082977  | -0.681279 |
| C | -0.536660 | -0.236290 | -0.181696 |
| F | 0.331041  | 1.385283  | 0.783746  |
| H | 0.779714  | 0.736160  | -1.535967 |
| F | -1.639569 | 0.265038  | -0.632783 |
| F | -0.703981 | -1.088804 | 0.785840  |
| O | 1.825928  | -0.502256 | -0.290342 |
| H | 1.718209  | -0.851889 | 0.605320  |

##### Frequencies[1/cm]

3778.86 3276.02 1740.70 1443.39  
1386.49 1349.64 1205.70 923.61  
892.89 637.79 555.85 491.46  
431.81 310.72 247.93 228.17

144.28 -387.42

!\*\*\*\*\*

Barrier TS8

Geometry[angstrom]

|   |           |           |           |
|---|-----------|-----------|-----------|
| C | 0.760681  | -0.271376 | -0.401095 |
| C | -0.628368 | -0.036779 | 0.125651  |
| F | 1.536968  | 0.847881  | -0.359553 |
| H | 0.873984  | -0.742583 | -1.376348 |
| F | -1.622671 | -0.652523 | -0.508401 |
| F | -0.978067 | 1.189086  | 0.479199  |
| O | 1.008886  | -1.136217 | 0.676329  |
| H | -0.165030 | -0.778755 | 1.117166  |

Frequencies[1/cm]

3138.07 2039.74 1442.79 1350.80  
1292.58 1223.55 1141.24 1085.86  
1039.72 978.38 706.74 629.36  
541.19 457.92 369.24 226.85  
116.55 -2346.01

!\*\*\*\*\*

Barrier TS9

Geometry[angstrom]

|   |           |           |           |
|---|-----------|-----------|-----------|
| C | -0.475843 | -0.060671 | -0.630778 |
| C | 0.824724  | 0.021534  | -0.100409 |
| F | -1.736926 | -0.826108 | 0.695795  |
| H | -0.672462 | -0.907290 | -1.283038 |
| F | 1.695755  | -0.926612 | -0.253473 |
| F | 1.231187  | 0.981789  | 0.656144  |
| O | -1.273953 | 0.963688  | -0.538850 |
| H | -1.939356 | 0.370987  | 0.094759  |

Frequencies[1/cm]

3176.50 2246.74 1648.01 1474.98  
1384.57 1306.28 1036.77 937.63  
816.35 720.10 637.63 482.05  
478.09 429.68 243.92 135.52  
74.65 -1316.60

!\*\*\*\*\*

Barrier TS10

Geometry[angstrom]

|   |           |           |           |
|---|-----------|-----------|-----------|
| C | -0.412877 | 0.003123  | -0.004186 |
| C | 0.968983  | -0.644242 | 0.062889  |
| F | -0.387258 | 1.193311  | -0.585146 |
| H | 0.969280  | -1.688436 | 0.400392  |
| F | -1.252676 | -0.793841 | -0.680360 |
| F | -0.902114 | 0.146261  | 1.240021  |
| O | 1.984474  | -0.018433 | -0.176358 |
| H | 2.696723  | 0.771027  | 0.887611  |

Frequencies[1/cm]

3060.54 1768.04 1401.71 1324.70  
1209.55 1179.64 956.40 857.57  
707.28 601.10 538.53 529.30  
432.32 325.23 262.52 163.74

54.27 -1947.79

!\*\*\*\*\*

Barrier TS11

Geometry[angstrom]

|   |           |           |           |
|---|-----------|-----------|-----------|
| C | -0.509137 | -0.211286 | 0.076047  |
| C | 0.665024  | -1.005871 | 0.012547  |
| F | -0.839114 | 0.503261  | 1.105600  |
| H | 0.629558  | -2.033769 | -0.330042 |
| F | 0.475541  | 1.318638  | -0.656997 |
| F | -1.543370 | -0.521940 | -0.636889 |
| O | 1.775942  | -0.375691 | 0.203880  |
| H | 1.390066  | 0.642601  | -0.137995 |

Frequencies[1/cm]

3203.50 1934.02 1618.25 1441.76  
1381.29 1280.44 1232.60 932.02  
763.08 739.37 708.16 609.37  
476.74 437.98 362.81 246.30  
181.93 -1123.42

!\*\*\*\*\*

Barrier TS12

Geometry[angstrom]

|   |           |           |           |
|---|-----------|-----------|-----------|
| C | -0.812917 | -0.017811 | 0.349238  |
| C | 0.979501  | 0.146718  | -0.353998 |
| F | -1.315926 | -1.133910 | -0.145148 |
| H | -0.640434 | -0.042947 | 1.422304  |
| F | 1.472105  | -1.041791 | 0.137874  |
| F | -1.486472 | 1.028295  | -0.076891 |
| O | 1.369470  | 1.201602  | 0.094654  |
| H | 0.657804  | -0.016651 | -1.393483 |

Frequencies[1/cm]

3170.34 3011.21 1632.23 1370.48  
1316.06 1223.01 1189.67 1137.97  
1002.68 964.44 644.07 587.22  
378.34 351.59 299.72 164.15  
60.64 -478.71

!\*\*\*\*\*

Barrier TS13

Geometry[angstrom]

|   |           |           |           |
|---|-----------|-----------|-----------|
| C | 0.705893  | -0.021424 | -0.364184 |
| C | -0.775968 | 0.149818  | 0.037121  |
| F | 1.231041  | -1.134099 | 0.188038  |
| H | 0.775106  | -0.094712 | -1.452476 |
| F | -1.408646 | -1.042344 | -0.082260 |
| F | 1.402015  | 1.046011  | 0.061581  |
| O | -1.369032 | 1.185060  | 0.033863  |
| H | -0.422102 | 0.017760  | 1.637724  |

Frequencies[1/cm]

3101.24 1845.91 1390.90 1378.17  
1191.46 1171.75 1107.88 961.49  
725.27 624.74 599.68 567.99  
482.37 462.39 360.32 224.74

75.45 -1235.92

!\*\*\*\*\*

Barrier TS14

Geometry[angstrom]

|   |           |           |           |
|---|-----------|-----------|-----------|
| C | 0.399062  | -0.012737 | -0.008187 |
| C | -0.961063 | -0.662926 | -0.073998 |
| F | 1.339163  | -0.877730 | -0.415086 |
| H | -1.009343 | -1.702876 | 0.244402  |
| F | 0.472057  | 1.078732  | -0.773265 |
| F | 0.696728  | 0.351293  | 1.249576  |
| O | -2.057784 | 0.136224  | 0.087266  |
| H | -1.727913 | -0.303595 | -1.000453 |

Frequencies[1/cm]

3143.41 2494.22 1402.11 1302.85  
1203.85 1187.42 1178.10 917.46  
858.04 690.68 671.73 548.69  
518.66 423.93 331.25 227.40  
93.59 -2126.79

!\*\*\*\*\*

Barrier TS15

Geometry[angstrom]

|   |           |           |           |
|---|-----------|-----------|-----------|
| C | -0.542284 | -0.017227 | -0.000001 |
| C | 1.434966  | 0.675039  | -0.000010 |
| F | -1.306058 | 1.056887  | -0.000006 |
| F | -0.716117 | -0.728933 | 1.084249  |
| O | 2.101782  | -0.350353 | -0.000002 |
| H | 1.237230  | 1.232488  | 0.934261  |
| F | -0.716140 | -0.728958 | -1.084231 |
| H | 1.237259  | 1.232495  | -0.934284 |

Frequencies[1/cm]

2976.13 2910.31 1665.86 1499.77  
1311.00 1285.29 1249.14 1159.75  
980.94 644.65 628.94 531.81  
516.44 311.40 183.26 143.38  
72.04 -418.40

!\*\*\*\*\*

!

Products

!

!\*\*\*\*\*

Bimolecular P1

Fragment1 CH2FCFO

Geometry[angstrom]

|   |           |           |           |
|---|-----------|-----------|-----------|
| C | 0.741724  | -0.734759 | 0.000071  |
| C | -0.621765 | -0.077193 | 0.000002  |
| F | 1.767889  | 0.173727  | -0.000077 |
| H | 0.812167  | -1.363570 | -0.889299 |
| F | -0.558418 | 1.259219  | 0.000046  |
| O | -1.653669 | -0.662242 | -0.000061 |
| H | 0.812198  | -1.363304 | 0.889630  |

Frequencies[1/cm]

3137.47 3084.26 1893.06 1490.37  
1408.71 1283.21 1257.68 1116.90



1044.90 842.26 632.62 551.16  
495.47 255.35 43.70

!\*\*\*\*\*

Fragment2 F

Atom

!\*\*\*\*\*

Bimolecular P2

Fragment1 CF2O

Geometry[angstrom]

|   |           |           |          |
|---|-----------|-----------|----------|
| C | 0.000000  | 0.142570  | 0.000000 |
| F | -1.061750 | -0.633097 | 0.000000 |
| F | 1.061756  | -0.633085 | 0.000000 |
| O | -0.000007 | 1.317527  | 0.000000 |

Frequencies[1/cm]

1960.46 1255.37 974.05 782.11  
619.26 584.49

!\*\*\*\*\*

Fragment2 CH2F

Geometry[angstrom]

|   |           |           |           |
|---|-----------|-----------|-----------|
| C | 0.027407  | 0.656474  | 0.000000  |
| F | 0.027407  | -0.683287 | 0.000000  |
| H | -0.205551 | 1.105372  | 0.953901  |
| H | -0.205551 | 1.105372  | -0.953901 |

Frequencies[1/cm]

3319.15 3161.74 1484.88 1187.01  
1185.09 602.98

!\*\*\*\*\*

Bimolecular P3

Fragment1 CHF3O

Geometry[angstrom]

|   |           |           |          |
|---|-----------|-----------|----------|
| C | -0.740425 | -0.611887 | 0.000000 |
| C | 0.496646  | 0.135021  | 0.000000 |
| F | -1.861843 | 0.071571  | 0.000000 |
| H | -0.823315 | -1.686887 | 0.000000 |
| F | 1.537586  | -0.732754 | 0.000000 |
| O | 0.650537  | 1.312341  | 0.000000 |

Frequencies[1/cm]

3273.97 1929.25 1479.06 1255.43  
1147.85 943.53 695.88 659.27  
480.58 454.75 253.92 192.73

!\*\*\*\*\*

Fragment2 HF

Geometry[angstrom]

|   |          |          |           |
|---|----------|----------|-----------|
| F | 0.000000 | 0.000000 | 0.092108  |
| H | 0.000000 | 0.000000 | -0.828968 |

Frequencies[1/cm]

4123.19

!\*\*\*\*\*

Bimolecular P4

Fragment1 C2F3

Geometry[angstrom]

|   |           |           |           |
|---|-----------|-----------|-----------|
| C | 0.775619  | -0.599412 | -0.000002 |
| C | -0.415499 | -0.062054 | 0.000000  |
| F | 1.947314  | -0.030663 | 0.000001  |
| F | -1.527374 | -0.765269 | 0.000001  |
| F | -0.660020 | 1.236909  | 0.000000  |

Frequencies[1/cm]  
1976.50 1312.10 1251.46 953.81 629.27 574.58  
490.73 298.36 214.46

!\*\*\*\*\*

Fragment2 H2O

Geometry[angstrom]

|   |          |           |           |
|---|----------|-----------|-----------|
| O | 0.000000 | 0.000000  | 0.117724  |
| H | 0.000000 | 0.759692  | -0.470895 |
| H | 0.000000 | -0.759692 | -0.470895 |

Frequencies[1/cm]  
3938.88 3824.01 1644.89

!\*\*\*\*\*

Bimolecular P5

Fragment1 CF2CHO

Geometry[angstrom]

|   |           |           |          |
|---|-----------|-----------|----------|
| C | 0.000000  | 0.403943  | 0.000000 |
| C | -0.626498 | -0.874684 | 0.000000 |
| F | 1.283931  | 0.587769  | 0.000000 |
| H | -1.726417 | -0.822115 | 0.000000 |
| F | -0.677169 | 1.523055  | 0.000000 |
| O | 0.003068  | -1.918856 | 0.000000 |

Frequencies[1/cm]  
3012.98 1685.82 1521.05 1434.86  
1325.59 954.99 875.45 647.43  
484.10 353.17 244.74 219.66

!\*\*\*\*\*

Fragment2 HF

Geometry[angstrom]

|   |          |          |           |
|---|----------|----------|-----------|
| F | 0.000000 | 0.000000 | 0.092108  |
| H | 0.000000 | 0.000000 | -0.828968 |

Frequencies[1/cm]  
4123.19

!\*\*\*\*\*

Bimolecular P6

Fragment1 CF3CHO

Geometry[angstrom]

|   |           |           |           |
|---|-----------|-----------|-----------|
| C | 0.361049  | 0.005729  | -0.000003 |
| C | -1.065946 | -0.571660 | -0.000009 |
| F | 0.376100  | 1.328217  | -0.000106 |
| H | -1.092790 | -1.674184 | -0.000002 |
| F | 1.016179  | -0.436790 | 1.084001  |
| F | 1.016261  | -0.436964 | -1.083885 |
| O | -2.044336 | 0.122450  | -0.000002 |

Frequencies[1/cm]  
3003.58 1822.18 1411.14 1330.09  
1213.14 1190.46 981.85 852.48  
711.02 533.66 530.09 432.07

312.26 253.40 72.76

!\*\*\*\*\*

Fragment2 H

Atom

!\*\*\*\*\*

Bimolecular P7

Fragment1 CF2HCF0

Geometry[angstrom]

|   |           |           |           |
|---|-----------|-----------|-----------|
| C | 0.690835  | -0.134275 | 0.353336  |
| C | -0.767828 | 0.188190  | 0.017909  |
| F | 1.444165  | 0.959278  | 0.160055  |
| H | 0.797624  | -0.477517 | 1.384123  |
| F | -1.513992 | -0.908227 | 0.230469  |
| F | 1.116322  | -1.113762 | -0.481197 |
| O | -1.219266 | 1.214803  | -0.349442 |

Frequencies[1/cm]

3112.83 1923.02 1430.12 1382.16

1202.74 1171.22 1109.95 932.25

754.77 609.57 568.41 427.45

311.83 229.68 50.89

!\*\*\*\*\*

Fragment2 H

Atom

!\*\*\*\*\*

Bimolecular P8

Fragment1 CHF0

Geometry[angstrom]

|   |           |           |           |
|---|-----------|-----------|-----------|
| C | 0.126360  | 0.378401  | 0.000042  |
| F | -1.089403 | -0.195971 | -0.000007 |
| O | 1.129218  | -0.246515 | -0.000047 |
| H | 0.012723  | 1.465452  | 0.000181  |

Frequencies[1/cm]

3126.12 1865.88 1374.87 1081.07

1036.58 665.54

!\*\*\*\*\*

Fragment2 CF2H

Geometry[angstrom]

|   |           |           |           |
|---|-----------|-----------|-----------|
| C | -0.000004 | 0.487635  | -0.150309 |
| F | 1.093737  | -0.241925 | 0.028225  |
| H | -0.000007 | 1.428868  | 0.393798  |
| F | -1.093734 | -0.241928 | 0.028225  |

Frequencies[1/cm]

3155.10 1348.89 1200.27 1184.80

1030.52 553.92

!\*\*\*\*\*

Bimolecular P9

Fragment1 CH2O

Geometry[angstrom]

|   |           |           |          |
|---|-----------|-----------|----------|
| C | -0.530909 | 0.000000  | 0.000000 |
| H | -1.112400 | -0.938548 | 0.000000 |
| O | 0.676281  | -0.000001 | 0.000000 |

```

H          -1.112393    0.938550    0.000000
Frequencies[1/cm]
3001.74 2935.72 1783.55 1538.22
1268.08 1199.32
!*****
Fragment2 CF3
Geometry[angstrom]
C          -0.000013    0.000010    0.324772
F           1.024191   -0.726495   -0.072169
F          -1.141257   -0.523722   -0.072173
F           0.117075    1.250210   -0.072173
Frequencies[1/cm]
1271.46 1271.36 1099.93 708.52
511.52 511.50
!*****

```

### III. CCl<sub>2</sub>=CHCl + OH reaction:

```

Reactant1 CCl2=CHCl
Geometry[angstrom]
C          0.00000000    0.00000000    0.00000000
H          0.00000000    0.00000000    1.08234000
Cl         1.53551603    0.00000000   -0.74837788
C         -1.14020942   -0.00000000   -0.67559018
Cl        -2.64453008   -0.00000000    0.15522967
Cl        -1.23605065    0.00000000   -2.38102928
Frequencies[1/cm]
3142.38 1639.95 1230.07 941.39
851.23 819.56 632.95 470.86
383.71 265.26 193.45 163.61
!*****

```

```

Reactant2 OH
Geometry[angstrom]
O          0.00000000    0.00000000    0.00000000
H          0.00000000    0.00000000   -0.97015000
Frequencies[1/cm]
3700.73
!*****

```

```

Well PRCadd
Geometry[angstrom]
C          0.594024    0.421130   -0.801263
Cl         2.194392   -0.123527   -0.509787
H          0.501243    1.284770   -1.441769
C         -0.486210   -0.159638   -0.269367
Cl        -0.427273   -1.523056    0.761465
Cl        -2.052767    0.454876   -0.613543
O          0.323346    1.990704    1.533127
H          1.121126    1.479665    1.752217
Frequencies[1/cm]
3745.54 3250.33 1648.24 1276.48
957.92 858.38 808.72 642.29
479.02 392.61 305.21 279.10

```

213.55 173.65 136.63 89.46  
44.32 38.73

!\*\*\*\*\*

#### Well PRCabs

##### Geometry[angstrom]

|    |           |           |           |
|----|-----------|-----------|-----------|
| C  | -0.048061 | 0.858482  | 0.000201  |
| C  | -0.144695 | -0.473019 | 0.000082  |
| H  | 0.915403  | 1.348579  | 0.000448  |
| O  | 3.336994  | 1.401684  | -0.000129 |
| H  | 3.257210  | 0.431385  | -0.000373 |
| Cl | -1.413263 | 1.891129  | -0.000048 |
| Cl | -1.617376 | -1.340505 | -0.000335 |
| Cl | 1.282873  | -1.450990 | 0.000339  |

##### Frequencies[1/cm]

3729.47 3231.08 1642.64 1300.77  
947.00 860.54 836.69 641.91  
467.16 390.03 281.47 263.43  
207.20 173.05 98.00 91.14  
56.38 14.03

!\*\*\*\*\*

#### Well POSTabs

##### Geometry[angstrom]

|    |           |           |           |
|----|-----------|-----------|-----------|
| C  | 0.725330  | 0.215316  | -0.547532 |
| C  | -0.361473 | -0.414781 | -0.205156 |
| H  | -0.975535 | 2.419995  | 0.510833  |
| O  | -0.208481 | 2.871779  | 0.877244  |
| H  | -0.535635 | 3.740129  | 1.128101  |
| Cl | -0.368591 | -1.870025 | 0.727172  |
| Cl | -1.918066 | 0.185390  | -0.659014 |
| Cl | 2.345238  | 0.041249  | -0.311732 |

##### Frequencies[1/cm]

3922.15 3806.51 1888.10 1644.64  
897.37 873.60 609.58 498.70  
398.26 264.70 224.63 189.52  
163.57 128.93 75.94 73.43  
32.71 13.72

!\*\*\*\*\*

#### Well IM1

##### Geometry[angstrom]

|    |           |           |           |
|----|-----------|-----------|-----------|
| C  | 0.828991  | -0.088886 | 0.728114  |
| C  | -0.605816 | 0.100637  | 0.366539  |
| H  | 0.923059  | -0.869159 | 1.478266  |
| O  | 1.440208  | 1.045652  | 1.204763  |
| H  | 1.318312  | 1.757511  | 0.562839  |
| Cl | -1.019453 | 1.472035  | -0.559872 |
| Cl | -1.588201 | -1.277180 | 0.230695  |
| Cl | 1.719296  | -0.743331 | -0.744184 |

##### Frequencies[1/cm]

3785.14 3161.14 1437.76 1307.18  
1238.73 1190.25 1087.39 971.49  
650.58 639.46 476.43 454.84

412.43 318.35 270.85 202.44  
134.11 67.02

!\*\*\*\*\*

Well IM2

Geometry[angstrom]

|    |           |           |           |
|----|-----------|-----------|-----------|
| C  | 0.807100  | -0.020374 | 1.276983  |
| C  | -0.103336 | -0.020062 | 0.119081  |
| H  | 0.447536  | 0.347170  | 2.225761  |
| O  | 2.135337  | 0.082914  | 1.090839  |
| H  | 2.361805  | -0.261946 | 0.214955  |
| Cl | 0.486355  | -1.175590 | -1.120858 |
| Cl | -1.727835 | -0.466598 | 0.647392  |
| Cl | -0.177027 | 1.612429  | -0.676170 |

Frequencies[1/cm]

3752.49 3254.33 1451.37 1352.30  
1222.92 1062.74 866.55 682.36  
580.07 559.82 461.80 436.96  
325.61 299.15 264.59 236.04  
188.40 104.85

!\*\*\*\*\*

Well IM3

Geometry[angstrom]

|    |           |           |           |
|----|-----------|-----------|-----------|
| C  | -0.656963 | -0.658766 | -0.328638 |
| C  | 0.499821  | 0.077008  | 0.388232  |
| H  | 0.345282  | 0.055329  | 1.463407  |
| O  | -0.660258 | -1.973621 | -0.092209 |
| H  | -0.531637 | -0.546075 | -1.417159 |
| Cl | -2.219788 | 0.135294  | 0.109217  |
| Cl | 0.568871  | 1.769203  | -0.121116 |
| Cl | 2.028051  | -0.741540 | 0.031537  |

Frequencies[1/cm]

3156.05 2988.44 1289.19 1246.56  
1192.35 1148.51 1091.61 990.98  
823.17 760.86 733.03 449.55  
355.00 333.99 314.63 250.31  
172.79 62.38

!\*\*\*\*\*

Well IM4

Geometry[angstrom]

|    |           |           |           |
|----|-----------|-----------|-----------|
| C  | -0.878313 | -0.058918 | 0.929019  |
| C  | 0.505990  | 0.006994  | 0.418267  |
| H  | -1.042853 | -0.269203 | 1.973588  |
| O  | 1.339040  | 0.014769  | 1.503308  |
| H  | 2.252268  | 0.036864  | 1.190602  |
| Cl | 0.756424  | 1.479112  | -0.603838 |
| Cl | 0.868850  | -1.423288 | -0.650695 |
| Cl | -2.195145 | -0.030782 | -0.114547 |

Frequencies[1/cm]

3804.70 3261.97 1404.09 1301.63  
1138.17 1093.79 898.04 724.04  
550.19 507.79 425.52 382.75

369.43 290.34 270.10 185.00  
154.63 51.14

!\*\*\*\*\*

Well IM5

Geometry[angstrom]

|    |           |           |           |
|----|-----------|-----------|-----------|
| C  | -0.874151 | -0.012963 | 0.589829  |
| C  | 0.597419  | 0.179806  | 0.576887  |
| H  | 0.909760  | 0.556589  | 1.546546  |
| O  | -1.524244 | 0.990084  | 1.222463  |
| H  | -2.475793 | 0.867013  | 1.120368  |
| Cl | 1.443800  | -1.342949 | 0.277000  |
| Cl | -1.638854 | -0.691097 | -0.796695 |
| Cl | 1.102135  | 1.425497  | -0.624242 |

Frequencies[1/cm]

3815.06 3158.31 1397.15 1311.02  
1232.80 1201.59 1078.88 825.00  
692.83 623.54 548.84 460.62  
381.52 325.77 265.07 170.85  
155.51 68.27

!\*\*\*\*\*

Well IM6

Geometry[angstrom]

|    |           |           |           |
|----|-----------|-----------|-----------|
| C  | -0.412712 | -0.072344 | 0.268990  |
| C  | 0.692657  | -0.857520 | -0.474782 |
| H  | 0.619997  | -1.903333 | -0.185971 |
| O  | -0.218656 | -0.226448 | 1.576425  |
| Cl | 2.321398  | -0.272786 | -0.107906 |
| Cl | -1.978648 | -0.793889 | -0.275814 |
| Cl | -0.404693 | 1.656862  | -0.184052 |
| H  | 0.502616  | -0.739070 | -1.538567 |

Frequencies[1/cm]

3188.11 3115.22 1463.68 1314.50  
1247.42 1076.33 969.02 903.10  
797.77 756.06 600.39 421.50  
343.23 307.42 264.55 232.56  
149.21 104.04

!\*\*\*\*\*

!

Transition states

!\*\*\*\*\*

Barrier TSabs

Geometry[angstrom]

|    |           |           |           |
|----|-----------|-----------|-----------|
| C  | 0.000000  | 0.000000  | 0.000000  |
| C  | 0.000000  | 0.000000  | 1.320834  |
| H  | 1.076838  | 0.000000  | 1.934812  |
| Cl | 1.473012  | 0.000000  | -0.894307 |
| Cl | -1.433946 | 0.000000  | -0.942102 |
| Cl | -1.332713 | 0.000000  | 2.354143  |
| O  | 2.207623  | -0.000130 | 2.411515  |
| H  | 2.735380  | -0.000265 | 1.596704  |

Frequencies[1/cm]

3762.73 1874.91 1423.50 975.85  
 902.62 839.13 770.09 677.83  
 476.39 450.94 349.94 279.67  
 215.09 165.80 123.86 106.68  
 49.46 -2013.23  
 !\*\*\*\*\*

Barrier TSadd-CHCl  
 Geometry[angstrom]  
 C -0.611981 -0.616897 -0.474166  
 C 0.505766 0.083102 -0.198176  
 H -0.543798 -1.569588 -0.973705  
 O -0.534126 -1.689261 1.318222  
 H -0.780491 -0.960004 1.908818  
 Cl 0.494703 1.662060 0.446173  
 Cl 2.041983 -0.626572 -0.431786  
 Cl -2.169945 0.096657 -0.452437  
 Frequencies[1/cm]  
 3763.15 3264.06 1593.30 1275.31  
 976.11 913.98 860.98 744.10  
 644.89 476.76 398.06 286.43  
 219.23 179.01 176.47 129.56  
 89.75 -515.01  
 !\*\*\*\*\*

Barrier TSadd-CCl<sub>2</sub>  
 Geometry[angstrom]  
 C 0.672139 -0.830163 -0.365888  
 C -0.398255 -0.034786 -0.135117  
 H 0.530632 -1.877172 -0.588652  
 O -0.237159 -0.479043 1.849182  
 H -0.618011 -1.371009 1.868759  
 Cl 2.277297 -0.291587 -0.270456  
 Cl -1.973336 -0.650529 -0.494222  
 Cl -0.283881 1.663894 -0.004000  
 Frequencies[1/cm]  
 3762.14 3244.48 1572.21 1289.21  
 965.19 877.94 802.22 771.03  
 636.75 407.31 365.14 296.30  
 258.39 231.18 196.49 155.69  
 131.37 -629.10  
 !\*\*\*\*\*

Barrier TS1  
 Geometry[angstrom]  
 C 0.738742 -0.168881 1.242660  
 C -0.147490 -0.279910 0.180843  
 H 0.396382 0.185774 2.204193  
 O 2.038703 -0.354225 1.145303  
 H 2.261726 -0.624382 0.238877  
 Cl 0.383692 -1.157820 -1.213468  
 Cl -1.827333 -0.365995 0.531371  
 Cl 0.119214 1.874706 -0.502992  
 Frequencies[1/cm]



3700.91 3251.65 1582.14 1386.79  
 1289.05 1205.02 970.43 868.31  
 631.73 569.84 477.73 304.57  
 300.75 250.42 229.39 162.74  
 129.27 -329.19  
 !\*\*\*\*\*

Barrier TS2

Geometry[angstrom]  
 C 0.682066 -0.850605 -0.060821  
 C -0.565473 -0.030088 0.216837  
 H -0.382905 -0.518671 1.402516  
 O 0.664303 -1.297384 1.273214  
 H 0.555542 -1.647167 -0.790054  
 Cl -2.035383 -0.681607 -0.449932  
 Cl -0.481354 1.695421 0.258571  
 Cl 2.152818 0.034955 -0.498890

Frequencies[1/cm]  
 3140.76 2058.68 1315.42 1258.41  
 1148.12 1074.23 998.36 886.34  
 832.67 761.41 503.82 460.92  
 398.60 277.17 236.59 173.81  
 76.32 -2222.95

!\*\*\*\*\*

Barrier TS3

Geometry[angstrom]  
 C 0.641494 -0.584055 0.072740  
 C -0.530616 0.079846 -0.019506  
 H 0.612162 -0.624412 1.905745  
 O 0.686171 -1.915892 -0.144580  
 H 1.442458 -2.283612 0.328976  
 Cl -2.005010 -0.781575 -0.023808  
 Cl -0.634274 1.779923 -0.002943  
 Cl 2.156387 0.252265 -0.055453

Frequencies[1/cm]  
 3805.13 1657.37 1282.01 1197.79  
 1003.24 830.62 674.25 594.73  
 519.40 499.25 407.82 368.21  
 296.76 260.99 257.04 181.94  
 113.23 -1223.03

!\*\*\*\*\*

Barrier TS4

Geometry[angstrom]  
 C 0.826038 -0.783142 0.432838  
 C -0.617205 0.109076 -0.407775  
 H 0.565139 -0.456462 1.448847  
 O 0.706045 -1.938698 0.048244  
 H -0.310060 0.002994 -1.441517  
 Cl -0.624862 1.749263 0.125860  
 Cl -2.052733 -0.764868 -0.030010  
 Cl 2.256628 0.192514 -0.127829

Frequencies[1/cm]

3192.25 3005.68 1464.92 1258.79  
1244.31 1072.04 959.14 864.96  
735.40 683.42 437.78 350.08  
332.76 270.95 218.56 149.97  
55.06 -727.29

!\*\*\*\*\*

#### Barrier TS5

##### Geometry[angstrom]

|    |           |           |           |
|----|-----------|-----------|-----------|
| C  | -0.657431 | -0.746574 | 0.132351  |
| C  | 0.521804  | 0.095284  | -0.420588 |
| H  | 0.387104  | 0.138572  | -1.500587 |
| O  | -0.614115 | -1.921094 | 0.324507  |
| H  | -0.523423 | -0.135863 | 1.665465  |
| Cl | 2.046944  | -0.715629 | -0.083236 |
| Cl | 0.525847  | 1.754622  | 0.184488  |
| Cl | -2.227909 | 0.094759  | -0.161929 |

##### Frequencies[1/cm]

3126.76 1837.31 1251.83 1230.30  
984.39 850.04 795.59 736.86  
611.78 519.39 488.14 407.07  
329.21 307.99 247.09 174.30  
54.48 -1198.23

!\*\*\*\*\*

#### Barrier TS6

##### Geometry[angstrom]

|    |           |           |           |
|----|-----------|-----------|-----------|
| C  | -0.820859 | -0.405214 | 0.772759  |
| C  | 0.477371  | 0.428902  | 0.637665  |
| H  | -0.724512 | -1.339062 | 1.320997  |
| O  | -0.994557 | 0.728412  | 1.449500  |
| H  | 1.135670  | 0.550843  | 1.481822  |
| Cl | 0.626603  | 1.607879  | -0.593973 |
| Cl | 1.679992  | -1.251213 | -0.053549 |
| Cl | -1.741522 | -0.661442 | -0.697265 |

##### Frequencies[1/cm]

3260.08 3147.87 1330.63 1295.79  
1240.65 1133.81 1107.24 904.94  
810.31 679.39 513.77 430.93  
337.78 256.57 207.93 151.76  
97.62 -1030.73

!\*\*\*\*\*

#### Barrier TS7

##### Geometry[angstrom]

|    |           |           |           |
|----|-----------|-----------|-----------|
| C  | 0.267713  | -0.707703 | 0.647160  |
| C  | 0.004692  | 0.402055  | -0.298312 |
| H  | -0.017851 | 0.203978  | -1.357224 |
| O  | -0.457580 | -1.730585 | 0.477150  |
| H  | 0.639282  | -0.437474 | 1.637110  |
| Cl | 2.139007  | -0.658938 | -0.281923 |
| Cl | 0.109189  | 2.010610  | 0.177654  |
| Cl | -2.165563 | -0.415668 | -0.259859 |

##### Frequencies[1/cm]

3280.54 3106.17 1448.14 1331.01  
 1263.43 1150.17 1035.80 974.14  
 887.03 546.22 508.17 438.81  
 318.88 267.62 196.90 163.73  
 85.49 -580.09  
 !\*\*\*\*\*

Barrier TS8

Geometry[angstrom]  
 C 0.749625 0.288517 0.864289  
 C -0.397599 -0.405539 0.532806  
 H 0.732293 0.921825 1.738518  
 O -1.333250 -0.534720 1.472877  
 H -2.196590 -0.642142 1.049508  
 Cl -0.423181 -1.542237 -0.755930  
 Cl -1.147914 1.563703 -0.542546  
 Cl 2.160397 0.255017 -0.051737

Frequencies[1/cm]  
 3777.14 3250.09 1522.24 1326.79  
 1236.79 1209.68 928.64 744.25  
 646.67 500.01 430.07 364.97  
 311.09 267.23 194.38 160.70  
 109.74 -334.2849

!\*\*\*\*\*

Barrier TS9

Geometry[angstrom]  
 C -0.474563 -0.068194 0.282850  
 C 0.762782 -0.927747 0.117208  
 H 0.585233 -1.016255 1.411935  
 O -0.508153 -0.342955 1.639941  
 Cl 2.278635 -0.256788 -0.327622  
 Cl -1.900411 -0.711595 -0.574075  
 Cl -0.308960 1.654141 -0.078188  
 H 0.573189 -1.922360 -0.273767

Frequencies[1/cm]  
 3179.17 2031.22 1273.44 1153.55  
 1130.11 1033.89 942.28 870.71  
 765.52 646.36 491.26 470.34  
 372.67 288.53 253.96 166.27  
 100.20 -2115.30

!\*\*\*\*\*

Barrier TS10

Geometry[angstrom]  
 C -0.552822 0.000114 0.451108  
 C 0.830662 -0.885046 -0.497008  
 O -0.275580 -0.221156 1.606833  
 Cl -0.446284 1.668114 -0.217695  
 H 0.511686 -0.654472 -1.506363  
 H 0.670716 -1.895304 -0.142558  
 Cl 2.364667 -0.251234 -0.100911  
 Cl -1.956313 -0.850491 -0.324356

Frequencies[1/cm]

3266.02 3140.73 1524.97 1432.57  
1119.69 1086.06 835.32 790.50  
719.21 545.98 461.52 398.02  
301.92 248.40 205.84 148.05  
96.88 -531.12

!\*\*\*\*\*

#### Barrier TS11

##### Geometry[angstrom]

|    |           |           |           |
|----|-----------|-----------|-----------|
| C  | -0.839646 | -0.131089 | 0.574860  |
| C  | 0.628371  | -0.128176 | 0.891680  |
| H  | -1.344640 | -0.420241 | 1.498287  |
| O  | 1.305688  | -1.151087 | 1.131921  |
| H  | 2.185308  | -0.633347 | 0.393839  |
| Cl | 2.055363  | 0.550033  | -0.632575 |
| Cl | -1.253748 | -1.338340 | -0.660740 |
| Cl | -1.390940 | 1.483477  | 0.131742  |

##### Frequencies[1/cm]

3103.27 1686.45 1572.55 1218.61  
1205.49 969.95 858.07 819.06  
706.37 530.82 500.31 449.52  
319.42 262.37 177.83 64.80  
40.97 -1869.84

!\*\*\*\*\*

#### Barrier TS12

##### Geometry[angstrom]

|    |           |           |           |
|----|-----------|-----------|-----------|
| C  | 0.158981  | 0.085738  | 0.265964  |
| C  | -0.251844 | -0.781602 | -0.836883 |
| H  | -0.415696 | -1.819590 | -0.601049 |
| O  | -0.498016 | -0.043167 | 1.326165  |
| Cl | 1.907012  | -1.031166 | 0.030079  |
| Cl | -2.295165 | -0.283973 | -0.115398 |
| Cl | 0.688741  | 1.715564  | -0.192003 |
| H  | -0.152991 | -0.467122 | -1.868281 |

##### Frequencies[1/cm]

3330.78 3192.76 1475.53 1302.88  
1179.90 1083.91 1015.51 892.41  
651.02 554.87 536.97 432.04  
350.29 285.75 222.76 207.63  
105.90 -875.90

!\*\*\*\*\*

#### Barrier TS13

##### Geometry[angstrom]

|    |           |           |           |
|----|-----------|-----------|-----------|
| C  | 0.599546  | 0.000000  | 0.348624  |
| C  | -0.663487 | 0.000000  | 1.214759  |
| O  | 0.960727  | 0.000000  | 1.617827  |
| H  | -0.997028 | 0.936134  | 1.631491  |
| Cl | -2.160285 | 0.000000  | -0.344107 |
| Cl | 0.924022  | -1.455542 | -0.580473 |
| H  | -0.997028 | -0.936134 | 1.631491  |
| Cl | 0.924021  | 1.455542  | -0.580473 |

##### Frequencies[1/cm]

3331.35 3198.04 1443.25 1288.51  
1180.08 1139.77 1002.22 863.41  
771.29 545.04 511.54 400.27  
332.95 265.07 253.87 141.12  
107.37 -902.46

!\*\*\*\*\*  
!  
! Products  
!\*\*\*\*\*

Bimolecular P1

Fragment1 C2Cl3

Geometry[angstrom]

|    |           |          |           |
|----|-----------|----------|-----------|
| C  | -0.673316 | 0.461346 | 0.000000  |
| C  | -0.673316 | 0.461346 | 1.303370  |
| Cl | 0.458685  | 0.461346 | -1.201614 |
| Cl | -2.140195 | 0.461346 | 2.204270  |
| Cl | 0.781516  | 0.461346 | 2.240009  |

Frequencies[1/cm]

1884.21 906.92 866.12 611.44 500.94 399.29 265.25  
212.11 132.31

!\*\*\*\*\*

Fragment2 H2O

Geometry[angstrom]

|   |          |           |           |
|---|----------|-----------|-----------|
| O | 0.000000 | 0.000000  | 0.117724  |
| H | 0.000000 | 0.759692  | -0.470895 |
| H | 0.000000 | -0.759692 | -0.470895 |

Frequencies[1/cm]

3938.88 3824.01 1644.89

!\*\*\*\*\*

Bimolecular P2

Fragment1 CCl2CClOH

Geometry[angstrom]

|    |           |           |           |
|----|-----------|-----------|-----------|
| C  | 0.658546  | -0.588260 | 0.000041  |
| C  | -0.493925 | 0.103029  | -0.000006 |
| H  | -0.143305 | -2.296407 | 0.000194  |
| O  | 0.754227  | -1.931117 | 0.000147  |
| Cl | -1.989509 | -0.766871 | 0.000079  |
| Cl | -0.600501 | 1.807802  | -0.000139 |
| Cl | 2.185408  | 0.174170  | -0.000033 |

Frequencies[1/cm]

3741.86 1684.53 1344.71 1193.58  
996.19 832.05 576.80 539.23  
419.46 407.34 367.26 286.83  
264.28 181.11 125.66

!\*\*\*\*\*

Fragment2 H

Atom

!\*\*\*\*\*

Bimolecular P3

Fragment1 CCl2CHOH

Geometry[angstrom]

|    |             |             |             |
|----|-------------|-------------|-------------|
| C  | 0.00000000  | 0.00000000  | 0.00000000  |
| C  | 0.00000000  | 0.00000000  | 1.32654000  |
| H  | 0.94464266  | 0.00000000  | -0.53633430 |
| O  | -1.14806471 | -0.00000260 | -0.70910351 |
| H  | -0.96278322 | 0.00001595  | -1.64733380 |
| Cl | -1.44747018 | 0.00000126  | 2.24024109  |
| Cl | 1.47423418  | -0.00000334 | 2.21065727  |

Frequencies[1/cm]  
3831.80 3107.12 1714.67 1305.18  
1238.40 1158.62 955.46 858.38  
646.88 469.95 452.77 274.27  
268.85 195.43 178.35  
!\*\*\*\*\*  
Fragment2 Cl  
Atom  
!\*\*\*\*\*

Bimolecular P4  
Fragment1 CHClO  
Geometry[angstrom]  

|    |           |           |          |
|----|-----------|-----------|----------|
| C  | 0.000000  | 0.794514  | 0.000000 |
| H  | -0.887695 | 1.434923  | 0.000000 |
| O  | 1.128644  | 1.157770  | 0.000000 |
| Cl | -0.478909 | -0.909657 | 0.000000 |

Frequencies[1/cm]  
3083.44 1809.83 1341.02 954.82  
745.52 460.18  
!\*\*\*\*\*  
Fragment2 CHCl2  
Geometry[angstrom]  

|    |           |           |           |
|----|-----------|-----------|-----------|
| C  | -0.011637 | 0.693622  | 0.000000  |
| H  | 0.465474  | 1.661062  | 0.000000  |
| Cl | -0.011637 | -0.171259 | 1.463221  |
| Cl | -0.011637 | -0.171259 | -1.463221 |

Frequencies[1/cm]  
3244.20 1254.82 909.96 773.34  
485.67 307.80  
!\*\*\*\*\*

Bimolecular P5  
Fragment1 CHCl2CClO  
Geometry[angstrom]  

|    |           |           |           |
|----|-----------|-----------|-----------|
| C  | 0.618659  | -0.000003 | 0.604829  |
| C  | -0.909786 | -0.000005 | 0.629977  |
| H  | 0.963068  | -0.000009 | 1.634131  |
| O  | -1.533134 | -0.000015 | 1.643525  |
| Cl | -1.666698 | 0.000009  | -0.954359 |
| Cl | 1.217137  | 1.468288  | -0.175494 |
| Cl | 1.217136  | -1.468287 | -0.175510 |

Frequencies[1/cm]  
3168.74 1818.33 1266.95 1256.25  
1100.90 818.45 802.66 643.02  
593.17 508.33 414.18 261.18  
174.64 167.13 50.69

!\*\*\*\*\*  
Fragment2 H  
Atom  
!\*\*\*\*\*

Bimolecular P6  
Fragment1 CHClOCHCl  
Geometry[angstrom]  
C -0.731125 0.750650 0.378937  
C 0.731126 0.750649 0.378937  
H -1.293988 1.406052 1.031952  
O -0.000002 1.387902 -0.653010  
H 1.293989 1.406057 1.031944  
Cl 1.644023 -0.674209 -0.040796  
Cl -1.644023 -0.674210 -0.040796  
Frequencies[1/cm]  
3194.53 3183.97 1389.45 1324.62  
1287.49 1130.77 1125.92 957.22  
830.02 821.55 681.14 485.89  
430.68 325.64 160.79

!\*\*\*\*\*  
Fragment2 Cl  
Atom  
!\*\*\*\*\*

Bimolecular P7  
Fragment1 CHCl2CHO  
Geometry[angstrom]  
C 1.348766 -0.000080 0.380835  
C 0.038982 -0.000014 -0.393718  
H 0.214339 -0.000021 -1.464557  
O 2.419274 -0.000129 -0.169346  
H 1.229246 -0.000077 1.477983  
Cl -0.856502 1.467886 0.041724  
Cl -0.856690 -1.467786 0.041725  
Frequencies[1/cm]  
3174.71 2991.84 1792.66 1402.49  
1248.27 1230.75 1080.82 1015.09  
796.63 751.58 443.22 325.25  
284.30 255.4050 83.11

!\*\*\*\*\*  
Fragment2 Cl  
Atom  
!\*\*\*\*\*

Bimolecular P8  
Fragment1 CCl2O  
Geometry[angstrom]  
C 0.000000 0.000000 0.495138  
Cl 0.000000 1.444513 -0.481746  
Cl 0.000000 -1.444513 -0.481746  
O 0.000000 0.000000 1.676067  
Frequencies[1/cm]  
1837.87 854.54 591.20 578.20

445.43 304.80  
 !\*\*\*\*\*  
 Fragment2 CH2Cl  
 Geometry[angstrom]  
 C 0.000000 -1.111876 0.000000  
 H 0.000001 -1.615000 0.951240  
 H 0.000001 -1.615000 -0.951240  
 Cl 0.000000 0.582427 0.000000  
 Frequencies[1/cm]  
 3351.35 3200.34 1437.69 1009.38  
 857.15 123.25  
 !\*\*\*\*\*

Bimolecular P9  
 Fragment1 CHCl2CO  
 Geometry[angstrom]  
 C 0.093406 -0.005453 0.567133  
 C -0.686229 -1.305786 0.350390  
 H 0.237145 0.152596 1.631513  
 O -1.617431 -1.510375 -0.336745  
 Cl -0.732234 1.418649 -0.094346  
 Cl 1.688660 -0.254070 -0.166988  
 Frequencies[1/cm]  
 3162.17 1926.46 1258.49 1216.05  
 843.66 798.01 697.80 601.28  
 371.03 279.27 201.92 73.70  
 !\*\*\*\*\*  
 Fragment2 HCl  
 Geometry[angstrom]  
 H 0.000000 0.000000 -1.205622  
 Cl 0.000000 0.000000 0.070919  
 Frequencies[1/cm]  
 3006.48  
 !\*\*\*\*\*

Bimolecular P10  
 Fragment1 CH2ClCCl0  
 Geometry[angstrom]  
 C -0.646480 0.630187 0.046909  
 C 0.709061 0.608455 0.720487  
 H 1.072587 1.629840 0.794323  
 O -1.167169 1.594239 -0.414769  
 Cl 1.863854 -0.332380 -0.251628  
 H 0.634048 0.142318 1.700690  
 Cl -1.437076 -0.959262 0.029203  
 Frequencies[1/cm]  
 3187.11 3112.42 1832.94 1476.31  
 1299.37 1214.61 1061.31 947.38  
 799.35 641.27 577.35 455.10  
 357.40 174.36 54.63  
 !\*\*\*\*\*  
 Fragment2 Cl  
 Atom  
 !\*\*\*\*\*



Bimolecular P11

Fragment1 CH2OCCl2

Geometry[angstrom]

|    |           |           |           |
|----|-----------|-----------|-----------|
| C  | -0.000010 | 0.234184  | -0.016674 |
| C  | 0.000045  | 1.568254  | -0.601647 |
| O  | 0.000023  | 1.317550  | 0.836801  |
| H  | 0.929323  | 1.970777  | -0.986440 |
| Cl | -1.455861 | -0.743994 | -0.029754 |
| Cl | 1.455830  | -0.744044 | -0.029750 |
| H  | -0.929195 | 1.970850  | -0.986459 |

Frequencies[1/cm]

3246.96 3138.44 1522.07 1354.03

1172.96 1117.57 1080.14 997.29

822.71 756.63 515.91 435.96

358.07 308.46 278.78

!\*\*\*\*\*

Fragment2 Cl

Atom

!\*\*\*\*\*

Bimolecular P12

Fragment1 CHClCClOH

Geometry[angstrom]

|    |             |             |             |
|----|-------------|-------------|-------------|
| C  | 0.00000000  | 0.00000000  | 0.00000000  |
| C  | 0.00000000  | 0.00000000  | 1.32531000  |
| H  | 0.93998943  | 0.00000000  | -0.53513079 |
| O  | 1.14801537  | -0.04965008 | 2.02663019  |
| H  | 0.99530296  | 0.21365134  | 2.93628589  |
| Cl | -1.44000211 | 0.02648288  | 2.27017387  |
| Cl | -1.42354721 | -0.02189715 | -0.94807389 |

Frequencies[1/cm]

3798.79 3152.96 1707.93 1284.72

1186.94 1171.16 884.03 787.81

647.47 515.24 473.31 385.64

254.36 173.82 161.82

!\*\*\*\*\*

Fragment2 Cl

Atom

## REFERENCES

- 1 Y. Georgievskii and S. J. Klippenstein, *J. Chem. Phys.*, 2003, **118**, 5442–5455.
- 2 Y. Georgievskii and S. J. Klippenstein, *J. Phys. Chem. A*, 2003, **107**, 9776–9781.
- 3 E. E. Greenwald, S. W. North, Y. Georgievskii and S. J. Klippenstein, *J Phys Chem A*, 2005, **109**, 6031–6044.
- 4 Y. Georgievskii and S. J. Klippenstein, *J. Phys. Chem. A*, 2007, **111**, 3802–3811.
- 5 A. D. Becke, *J. Chem. Phys.*, 1993, **98**, 5648–5652.
- 6 J.-D. Chai and M. Head-Gordon, *Phys. Chem. Chem. Phys.*, 2008, **10**, 6615–6620.
- 7 R. Peverati and D. G. Truhlar, *Phys. Chem. Chem. Phys.*, 2012, **14**, 13171–13174.
- 8 Y. Zhao and D. G. Truhlar, *J. Chem. Phys.*, 2006, **125**, 194101.
- 9 Y. Zhao and D. G. Truhlar, *J. Chem. Theory Comput.*, 2008, **4**, 1849–1868.
- 10 B. J. Lynch, Y. Zhao and D. G. Truhlar, *J. Phys. Chem. A*, 2003, **107**, 1384–1388.
- 11 V. Barone, J. Lupi, Z. Salta and N. Tassinato, *J. Chem. Theory Comput.*, 2021, **17**, 4913–4928.
- 12 N. Rais, Z. Salta and N. Tassinato, *ACS Earth Space Chem.*, 2023, **7**, 892–900.
- 13 O. N. Ventura, M. Segovia, M. Vega-Tejjido, A. Katz, M. Kieninger, N. Tassinato and Z. Salta, *J. Phys. Chem. A*, 2022, **126**, 6091–6109.
- 14 Z. Salta, M. Vega-Tejjido, A. Katz, N. Tassinato, V. Barone and O. N. Ventura, *Journal of Computational Chemistry*, 2022, **43**, 1420–1433.
- 15 T. J. Lee and P. R. Taylor, *International Journal of Quantum Chemistry*, 1989, **36**, 199–207.
- 16 J. C. Rienstra-Kiracofe, W. D. Allen and H. F. Schaefer, *J. Phys. Chem. A*, 2000, **104**, 9823–9840
- 17 G. Santra, N. Sylvetsky and J. M. L. Martin, *J. Phys. Chem. A*, 2019, **123**, 5129–5143.
- 18 S. Grimme, S. Ehrlich and L. Goerigk, *Journal of Computational Chemistry*, 2011, **32**, 1456–1465.
- 19 D. G. A. Smith, L. A. Burns, K. Patkowski and C. D. Sherrill, *J. Phys. Chem. Lett.*, 2016, **7**, 2197–2203.
- 20 E. Papajak, J. Zheng, X. Xu, H. R. Leverentz and D. G. Truhlar, *J. Chem. Theory Comput.*, 2011, **7**, 3027–3034.
- 21 L. B. Harding, Y. Georgievskii and S. J. Klippenstein, *J. Phys. Chem. A*, 2005, **109**, 4646–4656.
- 22 S. J. Klippenstein, Y. Georgievskii and L. B. Harding, *Phys Chem Chem Phys*, 2006, **8**, 1133–1147.
